# 1 Genetics of tibia bone properties of crossbred commercial laying hens 2 in different housing systems

3  
4 Martin Johnsson<sup>1</sup>, Helena Wall<sup>2</sup>, Fernando A Lopes Pinto<sup>1</sup>, Robert H. Fleming<sup>3</sup>, Heather A.  
5 McCormack<sup>3</sup>, Cristina Benavides-Reyes<sup>4</sup>, Nazaret Dominguez-Gasca<sup>4</sup>, Estefania Sanchez-  
6 Rodriguez<sup>4</sup>, Ian C. Dunn<sup>3</sup>, Alejandro B. Rodriguez-Navarro<sup>4</sup>, Andreas Kindmark<sup>5</sup>, Dirk-Jan de  
7 Koning<sup>1\*</sup>

8  
9 1 Department of Animal Breeding and Genetics, Swedish University of Agricultural Sciences,  
10 75651, Uppsala, Sweden

11 2 Department of Animal Nutrition and Management, Swedish University of Agricultural  
12 Sciences, 750 07, Uppsala, Sweden

13 3 The Roslin Institute, University of Edinburgh, EH25 9RG, Edinburgh, Scotland, UK

14 4 Departamento de Mineralogía Y Petrología, Universidad de Granada, 18002, Granada,  
15 Spain

16 5 Department of Medical Sciences, Uppsala University, Uppsala, Sweden

17 \* [DJ.De-Koning@slu.se](mailto:DJ.De-Koning@slu.se)

18

## 19 Abstract

20

21 Osteoporosis and bone fractures are a severe problem for the welfare of laying hens, with  
22 genetics and environment, such as housing system, each making substantial contributions to  
23 bone strength. In this work, we performed genetic analyses of bone strength, bone mineral  
24 density and bone composition, as well as body weight, in 860 commercial crossbred laying  
25 hens from two different companies, kept in either furnished cages or floor pens. We  
26 compared bone traits between housing systems and crossbreds, and performed a genome-  
27 wide association study of bone properties and body weight.

28

29 As expected, the two housing systems produced a large difference in bone strength, with  
30 layers housed in floor pens having stronger bones. These differences were accompanied by  
31 differences in bone geometry, mineralisation and chemical composition. Genome-scans  
32 either combining or independently analysing the two housing systems revealed no genome-  
33 wide significant loci for bone breaking strength. We detected three loci for body weight that  
34 were shared between the housing systems on chromosomes 4, 6 and 27 (either genome-  
35 wide significant or suggestive when the housing systems were analysed individually) and  
36 these coincide with associations for bone length.

37

38 In summary, we found substantial differences in bone strength, content and composition  
39 between hens kept in floor pens and furnished cages that could be attributed to greater  
40 physical activity in pen housing. We found little evidence for large-effect loci for bone  
41 strength in commercial crossbred hens, consistent with a highly polygenic architecture for  
42 bone strength in the production environment. The lack of consistent genetic associations

43 between housing systems in combination with the differences in bone phenotypes support  
44 gene-by-environment interactions with housing system.

45  
46  
47

## 48 Introduction

49

50 Osteoporosis and bone fractures, and more generally poor bone quality, are a severe  
51 problem for the welfare of laying hens, with genetics and environment, such as housing  
52 system, each making substantial contributions to bone strength. Over their lifetimes, layers  
53 experience progressive weakening of the structural bone (Cransberg et al., 2001; Wilson et  
54 al., 1992) and increasing risk of fractures. The heritability of tibiotarsal breaking strength,  
55 one of the main phenotypes used to measure bone strength, is estimated to be around 0.2-  
56 0.5 (Bishop et al., 2000; González-Cerón et al., 2015; Mignon-Grasteau et al., 2016).

57

58 Housing has a fundamental and complex influence on the bones of layer hens. On the one  
59 hand, housing systems that allow for more exercise promote bone development whereas  
60 systems that restrict movement induce bone loss, as bone adapts to loading (Aguado et al.,  
61 2015; Fleming et al., 2006, 1994; Jendral et al., 2008; Leyendecker et al., 2005; Newman and  
62 Leeson, 1998; Rodriguez-Navarro et al., 2018; Shipov et al., 2010). On the other hand,  
63 systems that encourage movement may also increase the fracture risk, for example due to  
64 accidental fall from height or collision (Abrahamsson and Tauson, 1993; Fleming et al., 2006;  
65 Gregory et al., 1990; Hester et al., 2013). Modern furnished cages allow for more movement  
66 and have a more complex environment than the non-furnished cages of old, but there are  
67 still environmental differences relevant to bone health between furnished cages and non-  
68 cage systems (Rodenburg et al., 2008; Wilkins et al., 2011). In commercial flocks housed in  
69 aviaries with different complexity, bone strength is higher in the more complex housing  
70 systems where hens move more (Pufall et al., 2021). Housing system also affects the  
71 geometry, mineralization and composition of bone, with non-caged birds having thicker and  
72 more mineralised cortical bone, and a larger amount of medullary bone, suggesting a  
73 greater capacity for bone formation in birds that can exercise more (Fleming et al., 2006;  
74 Rodriguez-Navarro et al., 2018; Shipov et al., 2010).

75

76 The genetic basis of bone strength in laying hens has previously been mapped in  
77 experimental intercrosses and within pedigree lines (Dunn et al., 2007; Raymond et al.,  
78 2018), but layer hens on-farm are generally crossbred and kept in different housing systems.  
79 This may make the genetic architecture of bone strength on-farm different from conditions  
80 previously studied by researchers, especially if there is gene-by-environment interaction. In  
81 particular, the genes which are involved in bone turnover in response to mechanical stimuli  
82 may differ from those involved in bone development in an environment with reduced  
83 mobility and bone loading.

84

85 In this work, we performed a genome-wide association study of tibial breaking strength,  
86 bone content and composition, as well as body weight in 860 commercial crossbred hens  
87 from two different companies, kept in either furnished cages or floor pens. We used a  
88 three-point bending test, peripheral quantitative computed tomography (QCT) and

89 thermogravimetric analysis (TGA) to estimate differences in bone strength, bone geometry,  
90 mineralization, and chemical composition between the housing systems.

91  
92

## 93 Materials and Methods

94

### 95 Crossbred layer hens

96

97 Crossbred layer hens of the genotypes Bovans White and Lohmann Selected Leghorn Classic  
98 (LSL) were reared at the same commercial rearing farm. Pullets destined for housing in floor  
99 pens were reared in an aviary system with full access to all tiers. Pullets destined for  
100 furnished cages were fenced in one of the tiers of the aviary to resemble rearing in a  
101 conventional rearing cage.

102

### 103 Management and housing

104

105 At 15 weeks of age, the pullets were transferred to the poultry experimental facility at the  
106 Swedish Livestock Research Centre Lövsta and subsequently housed either in furnished 8-  
107 hen cages or in a one-tier floor housing system. The housing systems and management has  
108 been described in Wall et al. 2021. The study was performed with ethical approval from the  
109 Uppsala Local Ethics Committee. In brief, each furnished cage provided 600 cm<sup>2</sup> cage area per  
110 hen, 150 cm<sup>2</sup> nest area, 150 cm litter area (on top of the nest box) and 15 cm perch length  
111 per hen (Victorsson Industrier AB, Frillesås, Sweden). Twice a week, litter boxes were  
112 replenished with saw-dust and manure belts underneath the cage were run. Each floor pen  
113 comprised 13.4 m<sup>2</sup> and was equipped with Vencomatic® one-tier system (Vencomatic  
114 Group, Eersel, The Netherlands). Two thirds of the floor area was a raised slatted area  
115 where nests, perches, circular feed hoppers and bell drinkers were located. The remaining  
116 floor area was covered with wood shaving. Each pen housed 102 layers. Scrapes under the  
117 slatted area removed manure twice a week. A lighting schedule providing 9 hours of light  
118 per day on arrival, with a successive increase to 14 hours at 23 weeks was applied in both  
119 housing systems.

120

121 As part of the same study, we evaluated the effect of organic zinc supplementation in feed.  
122 The sampled hens were from both dietary treatments (252 treatment and 257 control in  
123 furnished cages; 224 treatment and 235 control in floor pens). As the dietary treatment was  
124 not significantly associated with bone strength (average difference of 1.7 N,  $p = 0.54$  in a  
125 linear model including housing system and crossbred) we did not include diet in any of the  
126 further analyses in this paper. A detailed description of the organic zinc supplementation  
127 treatment and analyses of its effect on mortality, integument and bone strength will be  
128 published in (Wall et al., n.d.).

129

### 130 Bone phenotyping

131

132 At 100 weeks of age, material for bone phenotyping was collected. An intravenous injection  
133 of pentobarbital sodium (100mg/ml) euthanized the layers. Body weight was recorded and a

134 necropsy was conducted to make sure that only hens still in lay were chosen for bone  
135 phenotyping. The main phenotype for genome-wide association was tibiotarsal breaking  
136 strength (load to failure – we refer to it as “bone strength” for the rest of the paper).

137  
138 Quantitative computerized tomography (QCT) was performed with the Stratec QCT XCT  
139 Research M (Norland; v5.4B) operating at a resolution of 70  $\mu\text{m}$  as previously described  
140 (Rubin et al., 2007). Trabecular bone mineral density, which in the female bird reflects bone  
141 mineral density of both trabecular and medullary bone, was determined *ex-vivo*, with two  
142 metaphyseal QCT scans of the region situated at six percent of bone length from the distal  
143 end, and the medullary/trabecular bone was defined by setting an inner threshold to  
144 density mode ( $400 \text{ mg/cm}^3$ ). In addition to medullary/trabecular bone data, scans of the  
145 metaphyseal area were also used for derivation of data for total bone. Cortical bone  
146 parameters were determined *ex-vivo* with a mid-diaphyseal QCT scan of the tibia.  
147 After the QCT analyses the tibia were stored at  $-20^\circ\text{C}$  until biomechanical testing was  
148 performed.

149  
150 The tibiotarsal bones, which had previously been measured by QCT, were subsequently  
151 tested for biomechanical strength in a three-point bending test on an electromechanical  
152 testing machine (Avalon technologies, Rochester, MN, USA). The specimens were kept  
153 frozen until a few hours prior to testing when the bones were completely thawed at room  
154 temperature. The specimens were placed with the posterior cortex resting against two end  
155 supports placed with a distance of 40 mm between them. The bones were placed in such a  
156 way that the load was applied 6 mm distal from the mid part of the tibiotarsal diaphysis  
157 with an antero-posterior direction. The aim was to apply the load at the level where QCT  
158 measurements had been performed. An axial load cell (Sensotec inc., Columbus, OH, USA)  
159 with the range 0-500 N was used to apply a load of one mm/s to the bone. Values for load  
160 and displacement were collected 50 times per second until failure using software provided  
161 with the testing machine (Testware II). Based on the collected data load at failure was  
162 calculated.

163  
164 Because these QCT phenotypes are highly correlated (Supplementary Figure 1), we used  
165 principal component analysis to reduce the QCT data to three principal components that we  
166 used for genome-wide association. The first principal component had high loadings for most  
167 of the radiographic phenotypes, while the second had high loadings for bone length, and  
168 the third for mostly cortical density (Supplementary Figure 2).

169  
170 We used thermogravimetric analysis to measure bone mineralization and composition (in  
171 cortical and medullary bone, separately), and that mainly consist of water, organic matter  
172 (collagen), and mineral (carbonate, calcium, phosphate). Powdered bones were treated at  
173 200, 600, and 800  $^\circ\text{C}$  in a RWF 1100 furnace (Carbolite, UK) for one hour and weighed to  
174 determine the weight fraction of main bone chemical components. We estimated the  
175 percentage water ( $\text{H}_2\text{O}\%$ ), organic matrix (organic%), mineral (mineral%) of the bone, as  
176 well as the percentage calcium phosphate ( $\text{PO}_4\%$ ) and carbonate ( $\text{CO}_3\%$ ) that are the main  
177 mineral part components. We calculated the degree of mineralization ( $\text{PO}_4/\text{organic}$ ) and the  
178 relative content of carbonate in the mineral ( $\text{CO}_3/\text{PO}_4$ ). Because the thermogravimetric  
179 phenotypes are less correlated than the tomography phenotypes, we analysed them

180 separately instead of trying to reduce them with principal components (Supplementary  
181 Figure 3).

182

183 The resulting sample sizes for each set of phenotypes are shown in Supplementary Table 1.

184

185 The scanning electron microscopy images in Figure 2 were taken from mid diaphyseal cross-  
186 sections of the tibiae. Bones were embedded in EpoThin epoxy resin (Buehler), cut,  
187 polished and coated with carbon (Hitachi UHS evaporator). They were imaged with FEI  
188 Quanta 400 scanning electron microscope using a backscattering electron detector.

189

190 Genotyping

191

192 We genotyped 882 hens at 57,636 single nucleotide variants, using the Illumina Infinium  
193 assay. The genotyping was performed by the SNP&SEQ Technology Platform at Uppsala  
194 University, Uppsala, Sweden. We excluded 14 individuals with high missingness, as well as  
195 19 individuals that appeared to be recorded as the wrong crossbred based on a principal  
196 component plot of the genotypes (Supplementary Figure 4). In order to place the SNP  
197 markers on the latest reference genome, we aligned sequences flanking the markers to the  
198 chicken reference genome version GRCg6a with BLAT (Kent, 2002).

199

200 Comparisons between housing systems

201

202 We compared bone phenotypes and body weight between housing systems using linear  
203 models including housing system and crossbred as covariates, and then estimated the  
204 contrast between housing systems within each crossbred. Thus, the model was:

205

$$206 \quad y_i = \mu + \beta_{LSL}x_{cb,i} + \beta_{PEN}x_{hs,i} + \beta_{LSL:PEN}x_{cb,i}x_{hs,i} + \epsilon_i$$

207

208 Where  $y_i$  is the trait value,  $\mu$  the coefficient for Bovans hens in furnished cages,  $\beta_{LSL}$  the  
209 coefficient for LSL hens,  $\beta_{PEN}$  the coefficient for floor pens,  $\beta_{LSL:PEN}$  coefficient for the  
210 interaction,  $x_{cb,i}$  and  $x_{hs,i}$  indicator variables for crossbreds and housing systems  
211 respectively, and  $\epsilon_i$  a normally distributed error term. The contrasts of interest were  $-\beta_{PEN}$ ,  
212 the difference between floor pens and cages within the Bovans crossbreds, and  $-\beta_{PEN} -$   
213  $\beta_{LSL:PEN}$ , the difference between floor pens and cages within the LSL crossbreds.

214

215 We used R statistical environment (R Core Team, 2017), and the *multcomp* package for  
216 fitting linear contrasts (Hothorn et al., 2008).

217

218 Genome-wide association studies

219

220 We performed genome-wide associations studies using linear mixed models and a genomic  
221 relationship matrix, following the approach of (Rönnegård et al., 2016). That is, we first used  
222 the *hglm* R package (Rönnegård et al., 2010) to fit a linear mixed model, and use the  
223 covariance structure for this model and ordinary least squares to fit the model for each  
224 marker efficiently.

225

226 We performed genome scans separately for each housing system and jointly, combining the  
227 housing systems. Bone phenotype scans included body mass and crossbred, and in the case  
228 of joint scans also housing system, as fixed factors. Body weight scans included crossbred,  
229 and in the joint scan also housing system, as fixed factors. Genome scans of floor pens  
230 included the pen group as a random effect. Joint scans included group as a random effect,  
231 combining all furnished cages into one dummy group. We used a conventional genome-  
232 wide significance threshold of  $5 * 10^{-8}$ , and a suggestive threshold of  $10^{-4}$ . Supplementary  
233 Dataset 1 contains the summary statistics for all markers.

234

235 We used the same linear mixed models to estimate genomic heritability explained by the  
236 genomic relationship matrix, and perform a likelihood ratio test against a model without the  
237 additive genetic effect as a significance test of the heritability.

238

239

240 Bivariate genomic models

241

242 We used GCTA to estimate genomic heritability and genomic correlations between bone  
243 breaking strength in the two different housing systems (Lee et al., 2012), using breed and  
244 body weight as fixed effects. The software fits a bivariate linear mixed model using the  
245 genomic relationship matrix:

$$246 \quad \mathbf{y}_1 = \mathbf{X}_1 \mathbf{b}_1 + \mathbf{Z}_1 \mathbf{g}_1 + \mathbf{e}_1$$

247

$$248 \quad \mathbf{y}_2 = \mathbf{X}_2 \mathbf{b}_2 + \mathbf{Z}_2 \mathbf{g}_2 + \mathbf{e}_2$$

249

250 Where  $\mathbf{y}_1$  and  $\mathbf{y}_2$  are vectors of trait values;  $\mathbf{b}_1$  and  $\mathbf{b}_2$  are vectors of coefficients for the  
251 fixed effects (breed and body weight);  $\mathbf{g}_1$  and  $\mathbf{g}_2$  are vectors of additive genetic effects,  $\mathbf{X}_1$ ,  
252  $\mathbf{X}_2$ ,  $\mathbf{Z}_1$  and  $\mathbf{Z}_2$ ;  $\mathbf{e}_1$  and  $\mathbf{e}_2$  are residuals. The variance—covariance matrix uses the genomic  
253 relationship matrix derived from genotypes.

254

255 Attempted replication of previously detected bone loci

256

257 We attempted to replicate associations from genome-wide association and linkage mapping  
258 studies of bone traits from a pedigree line and an experimental intercross (Johnsson et al.,  
259 2015; Raymond et al., 2018). The selected candidate regions are listed in Supplementary  
260 Table 2. We used genome-wide association summary statistics from markers within 50 kbp  
261 of these regions.

262

263 Overlap with previously published loci from chicken QTLdb

264

265 We used the GALLO R package (Fonseca et al., 2020) to perform a enrichment test with  
266 known quantitative trait loci from the Chicken QTLdb database (Hu et al., 2015) and a  
267 hypergeometric test. We mapped the QTL coordinates from the chicken reference genome  
268 version Galgal5.0 to GRCg6a with the UCSC LiftOver tool, which resulted in a total of 8427  
269 QTL that could be mapped.

270



271 Availability of data and code

272

273 The summary statistics of all genome-wide association studies are included in the paper as  
274 Supplementary Dataset 1.

275

276 The underlying data have been deposited to Figshare with doi  
277 10.6084/m9.figshare.14405894, containing one file of SNP chip genotypes; one phenotype  
278 file of bone traits, body weight and covariates; a file mapping phenotype column names to  
279 the trait names used in the article; and one file of marker positions.

280

281 The analysis scripts are available at [https://github.com/mrtnj/layer\\_bone\\_gwas](https://github.com/mrtnj/layer_bone_gwas).

282

## 283 Results

284

285 Differences between housing systems and crossbreds

286

287 As expected, bone strength (load to failure) was higher (on average 65 N) in the floor pen  
288 system than in the cage system, while body weight was similar. Figure 1 shows body weight  
289 and tibial breaking strength in both housing systems and crossbreds, with estimated  
290 differences from a linear model. The crossbreds had similar tibial breaking strength, but  
291 Bovans were on average 55 g heavier than LSL hens. Figure 2 displays electron microscopy  
292 images of tibia from hen housed in a floor pen and a hen housed in a furnished cage  
293 showing the distribution of cortical and medullary bone in cross-section. The hen housed in  
294 a floor pen had a thicker cortex and a larger amount of medullary bone than the hen from a  
295 furnished cage. Also, medullar bone particles are larger and interconnected in the floor pen  
296 whereas in furnished cage particles are smaller and isolated. These differences suggest that  
297 hens housed in floor pens have a greater capacity to form bone and mineralise the medullar  
298 cavity than hens housed in furnished cages.

299

300 Also as expected, there was a positive relationship between body weight and tibial breaking  
301 strength in both systems, explaining around 10% of the variance in tibial breaking strength.  
302 Figure 3 shows scatterplots of tibial breaking strength and body weight with regression  
303 coefficients from a linear model, showing a positive relationship between body weight and  
304 bone strength regardless of housing system.

305

306 These differences in bone strength between housing systems were accompanied by  
307 differences in bone geometry, mineral content, cortical thickness and bone mineral density  
308 (as measured by quantitative computed tomography, QCT) and chemical composition (as  
309 measured by thermogravimetric analysis, TGA) between the housing systems. Figure 4  
310 shows heatmaps of the correlations between these bone biomechanical properties, broken  
311 down by housing system. Figure 5 shows estimates from a linear model for the first three  
312 principal components of the QCT measurements and the main bone composition  
313 phenotypes from thermogravimetric measurements (Supplementary Figure 4 shows all  
314 variables). Overall, there were differences between the housing systems in most aspects of  
315 bone content and composition.

316

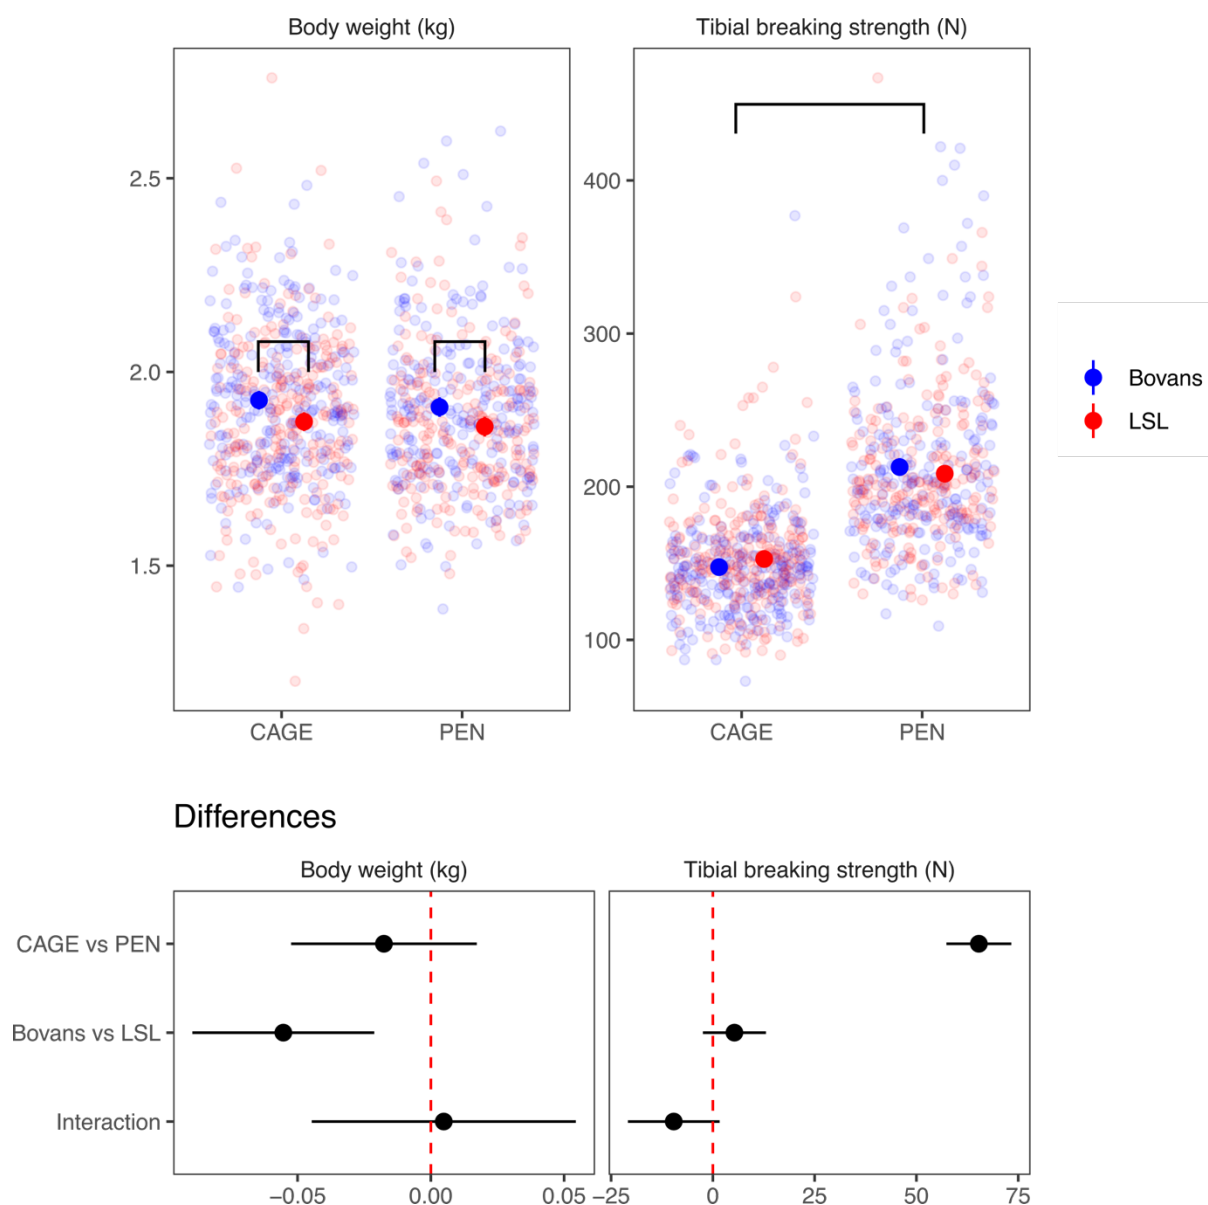

317  
318

319 *Figure 1. Differences in bone strength between housing systems. Body weight and tibial*  
320 *breaking strength broken down by housing system and crossbred, and estimates of*  
321 *differences between housing systems and crossbreds from a linear model including housing*  
322 *system, breed and an interaction term. The error bars are 95% confidence intervals. The*  
323 *brackets indicate significant differences in body weight between breeds and bone breaking*  
324 *strength between housing systems.*

325



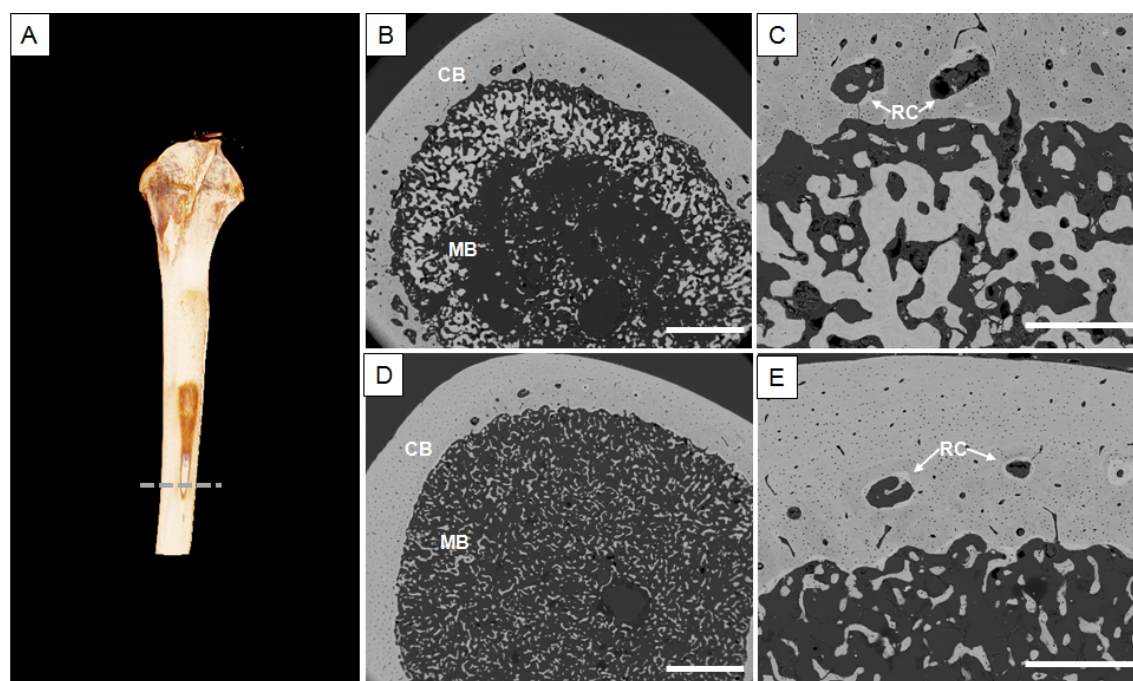

326  
327

328 *Figure 2. A) 3D image of a tibiae reconstructed from micro-CT. Electron backscattering*  
329 *images of tibia cross-section at mid-shaft from hens of different groups: PEN (B-C) and CAGE*  
330 *(D-E). CB: cortical bone. MB: Medullary bone. RC: resorption center. Scale bar B and D: 1*  
331 *mm; C and E: 400  $\mu$ m. Pen birds shows a greater amount of medullary bone particles near*  
332 *the endosteal surface.*

333

334

335 The first QCT principal component, for which cortical density, thickness and bone mineral  
336 content had the largest contributions, also show that bone quality was improved in hens  
337 housed in a floor pen. Also, the tibia of hens housed in pens had cortical bone with a greater  
338 degree of mineralisation and a larger amount of medullary bone than hens housed in  
339 furnished cages, as indicated by the PO<sub>4</sub>/organic and PO<sub>4</sub>% parameters determined by TGA  
340 for both types of bone (Figure 5). Additionally, there were differences in bone chemical  
341 composition, such as the amount of carbonate (CO<sub>3</sub>/PO<sub>4</sub>) in the cortical bone mineral was  
342 significantly lower for hen housed in pens than those housed in furnished cages  
343 (Supplementary Figure 4).

344

345

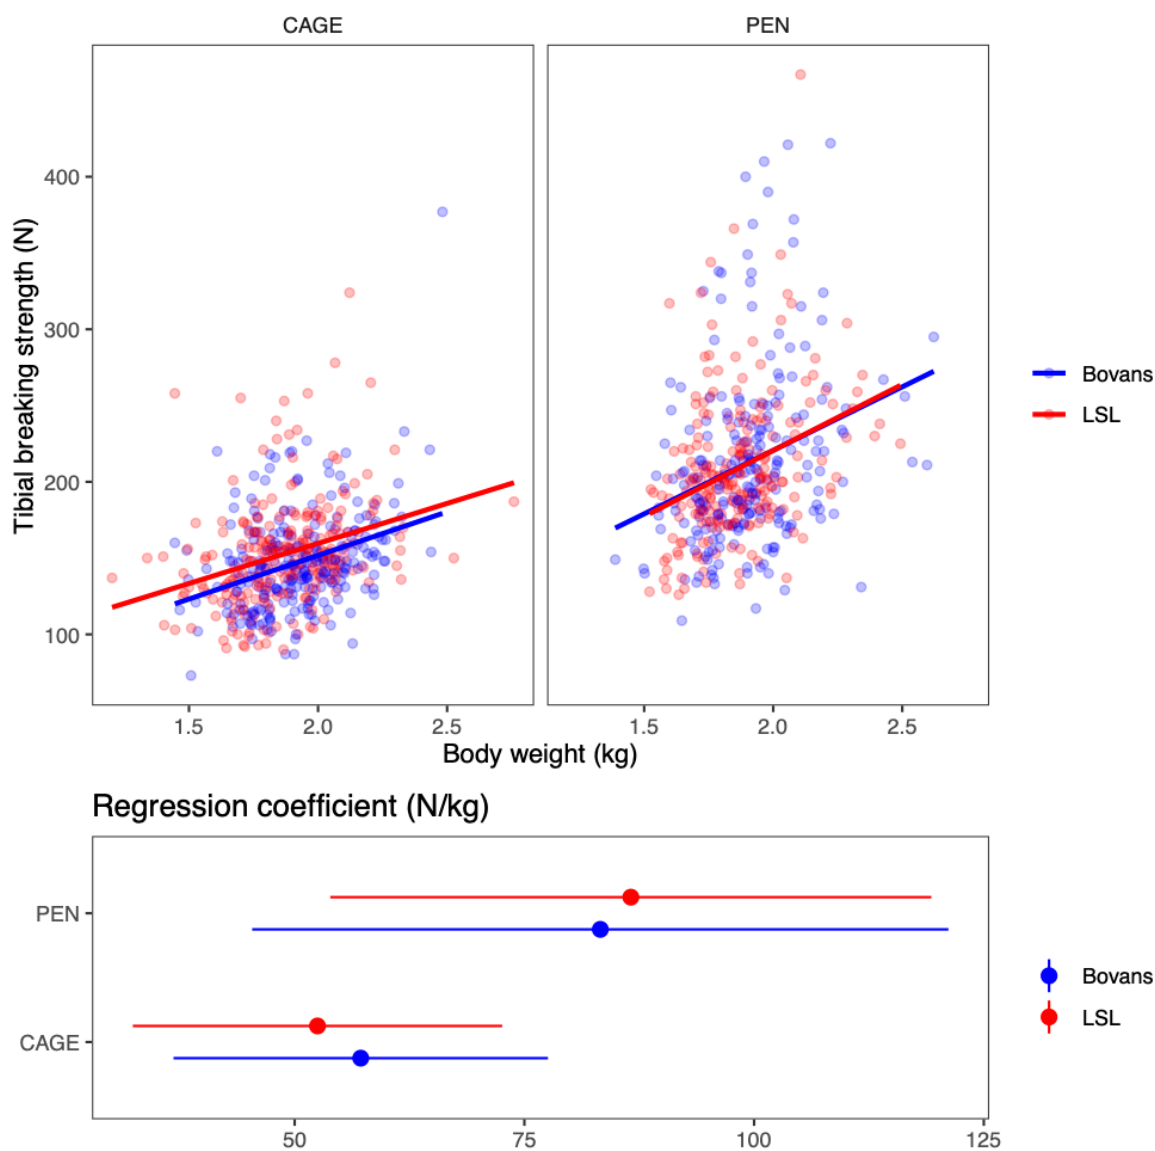

346  
347 *Figure 3. Relationship between bone strength and body weight. Tibial breaking strength and*  
348 *body weight broken down by housing system and breed and regression coefficients from a*  
349 *linear model within breed and housing system. The error bars are 95% confidence intervals.*  
350

### Correlations between bone phenotypes

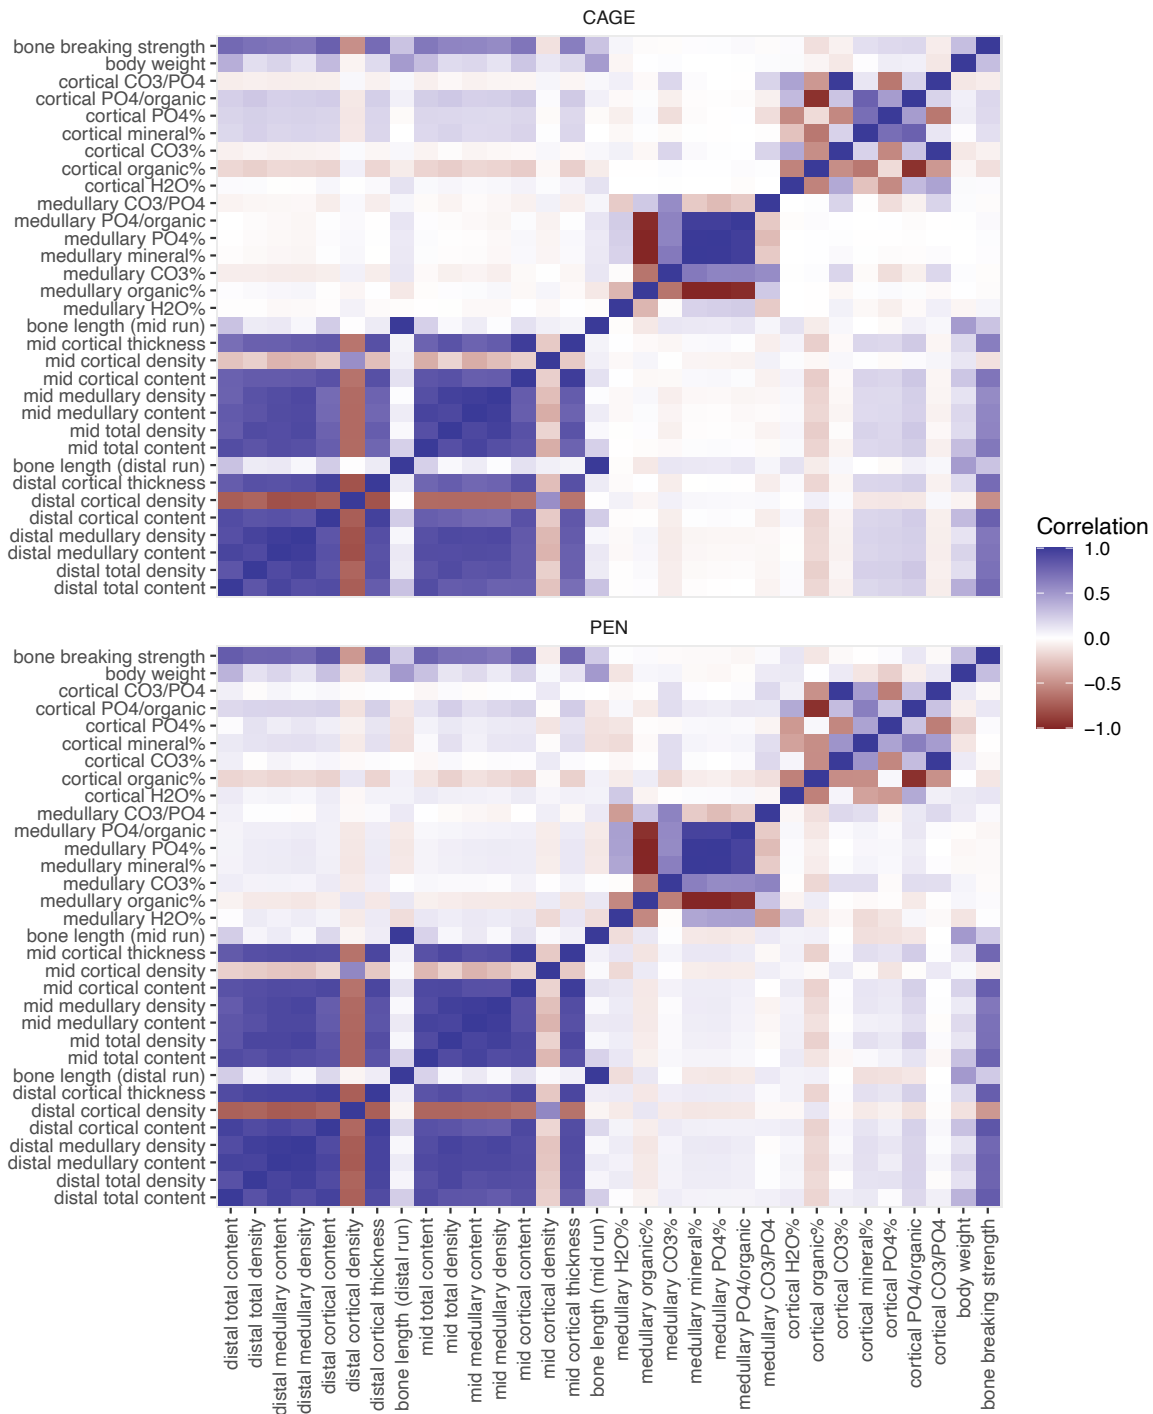

351

352

353 *Figure 4. Correlations between bone phenotypes and body weight. The heatmaps show*  
 354 *Pearson correlation of body weight, bone breaking strength, density, thickness, content and*  
 355 *bone composition traits, separated by housing system.*

356

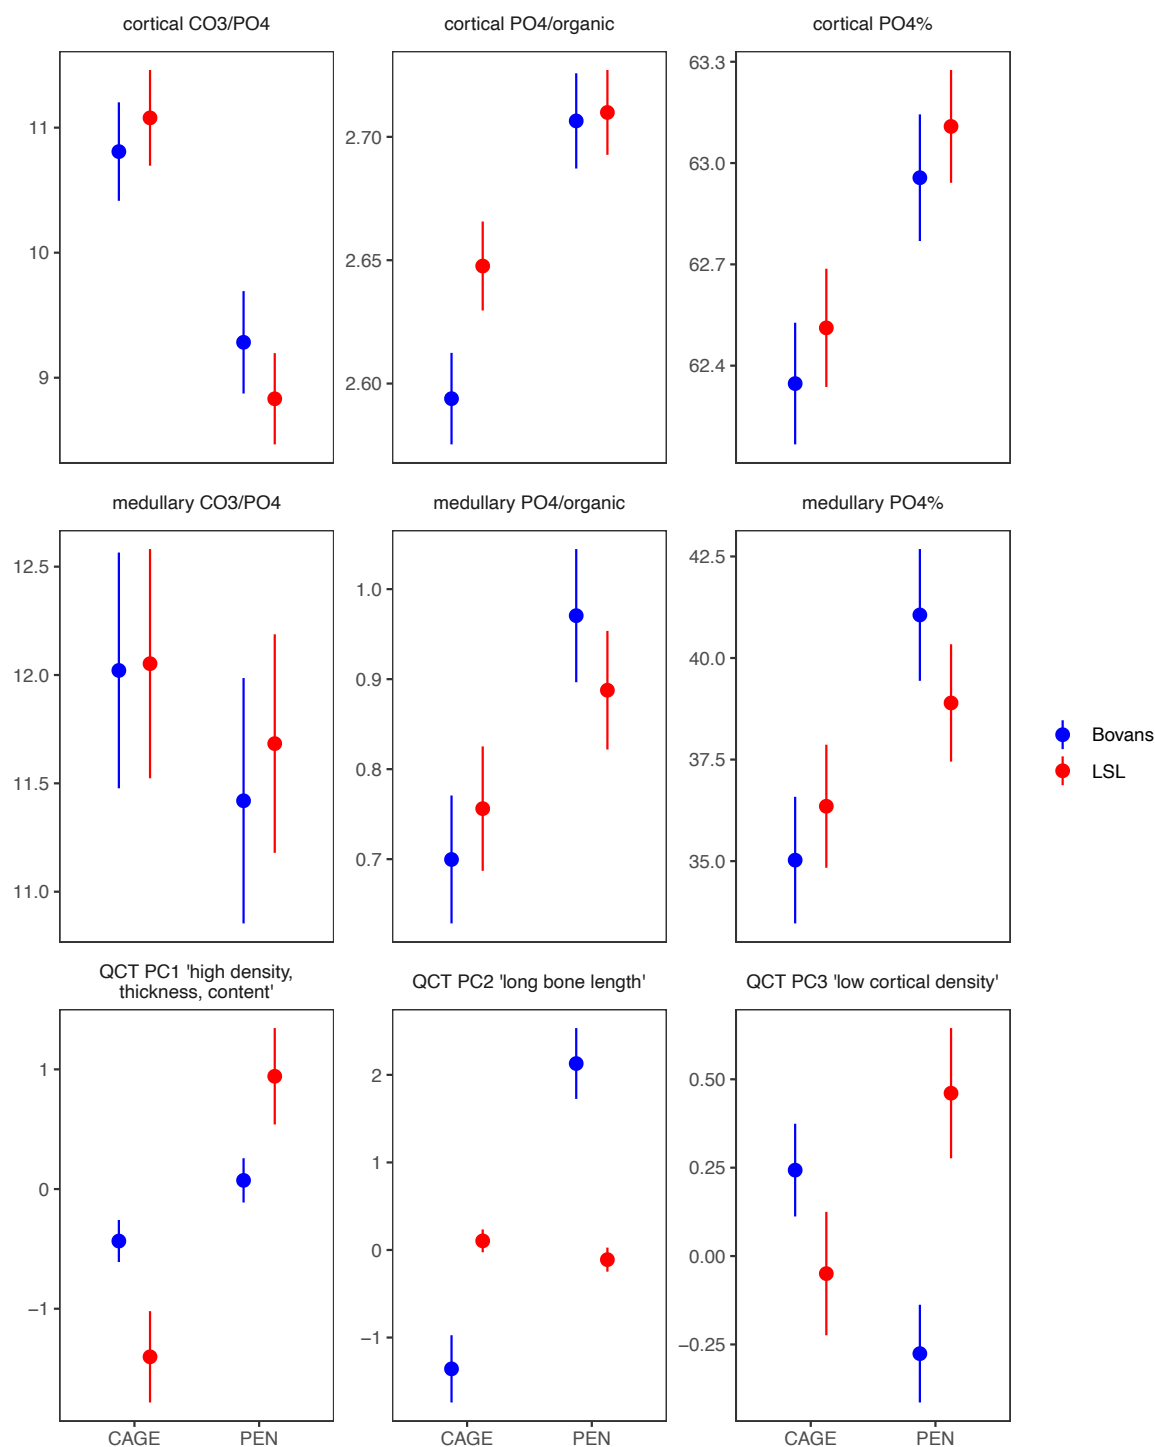

357  
 358 *Figure 5. Differences in main bone phenotypes between housing systems. Estimates of*  
 359 *means broken down by housing systems and crossbreds from a linear model including*  
 360 *housing system, breed and an interaction term, with 95% confidence intervals. All the within*  
 361 *breed comparisons between housing systems, except for medullary CO3/PO4, are significant*  
 362 *at the  $p < 0.05$  level.*  
 363  
 364

365 Heritability of bone phenotypes

366

367 Bone strength, body weight and tomographic phenotypes had moderate to high genomic  
 368 heritability. Table 1 shows the estimated genomic heritability and the p-value of a likelihood  
 369 ratio test for the genomic additive genetic effect. The estimates for bone composition traits  
 370 (measured by thermogravimetric analysis) were generally lower and most of them were not  
 371 statistically significant at the  $p < 0.05$  level. It should be noted that this analysis has a smaller  
 372 sample size than the bone strength and tomographic traits.

373

374 *Table 1. Heritability estimates for bone phenotypes and body mass, separated by cage and*  
 375 *pen, with p-values from a likelihood ratio test for the genomic variance component. Bold*  
 376 *estimates are significant at the  $p < 0.05$  level.*

377

|                                            | CAGE           |                 | PEN            |                 |
|--------------------------------------------|----------------|-----------------|----------------|-----------------|
|                                            | h <sup>2</sup> | p-value         | h <sup>2</sup> | p-value         |
| bone strength                              | 0.27           | 0.08            | <b>0.42</b>    | <b>4.95E-04</b> |
| body weight                                | <b>0.46</b>    | <b>1.18E-05</b> | <b>0.63</b>    | <b>3.18E-06</b> |
| QCT PC1 'high density, thickness, content' | 0.25           | 0.06            | <b>0.57</b>    | <b>1.99E-05</b> |
| QCT PC2 'long bone length'                 | <b>0.35</b>    | <b>0.01</b>     | <b>0.54</b>    | <b>5.43E-05</b> |
| QCT PC3 'low cortical density'             | <b>0.32</b>    | <b>0.01</b>     | 0.27           | 0.05            |
| cortical CO3%                              | 0.16           | 0.05            | <b>0.23</b>    | <b>0.02</b>     |
| medullary CO3%                             | 0.28           | 0.08            | 0.13           | 0.24            |
| cortical CO3/PO4                           | 0.17           | 0.05            | <b>0.23</b>    | <b>0.02</b>     |
| medullary CO3/PO4                          | 0.26           | 0.08            | 0.25           | 0.17            |
| cortical mineral%                          | <b>0.35</b>    | <b>1.14E-03</b> | 0.20           | 0.20            |
| medullary mineral%                         | 0.15           | 0.08            | 0.23           | 0.18            |
| cortical organic%                          | <b>0.22</b>    | <b>1.64E-03</b> | 0.13           | 0.14            |
| medullary organic%                         | 0.25           | 0.05            | 0.24           | 0.14            |
| cortical PO4%                              | <b>0.37</b>    | <b>0.03</b>     | 0.21           | 0.13            |
| medullary PO4%                             | 0.14           | 0.08            | 0.23           | 0.15            |
| cortical PO4/organic                       | <b>0.20</b>    | <b>3.23E-03</b> | 0.14           | 0.07            |
| medullary PO4/organic                      | 0.10           | 0.13            | 0.22           | 0.15            |
| cortical H2O%                              | <b>0.25</b>    | <b>0.01</b>     | <b>0.16</b>    | <b>0.03</b>     |
| medullary H2O%                             | 0.31           | 0.05            | 0.23           | 0.35            |

378

379

380

381 Genome-wide association for bone strength and body weight

382

383 Genome-scans either combining or independently analysing the two housing systems  
 384 detected no genome-wide significant loci for bone strength ( $p < 5 * 10^{-8}$ ), but five suggestive  
 385 loci ( $p < 10^{-4}$ ). Figure 6 shows Manhattan plots of the genome-wide association studies for  
 386 bone strength, analysing the housing systems jointly and independently. Supplementary  
 387 figure 6 shows quantile-quantile plots, and Supplementary figure 7 a zoomed-in view of the  
 388 suggestive loci.

389

390 The suggestive associations with bone strength did not overlap previously detected  
 391 candidate regions for bone strength defined from other populations (Supplementary Table  
 392 2). However, there were markers with  $p < 0.01$  in three of these regions, on chromosomes  
 393 2, 8 and 23 (Supplementary Table 3).

394

395 We detected three significant loci for body weight on chromosomes 4, 6 and 27 that were  
 396 either significant ( $p < 5 * 10^{-8}$ ) or suggestive ( $p < 10^{-4}$ ) in both the joint and separate scans.  
 397 Supplementary Figure 8 shows a zoomed in view of the three body weight loci. Table 2  
 398 shows the locations of significant associations.

399

400 Because the chromosome 4 locus contains multiple significant markers spread over a region  
 401 of several megabasepairs, we performed a conditional scan that included the most  
 402 significant marker in the region as a covariate (Supplementary Figure 9). Controlling for the  
 403 most significant marker abolished the significant association throughout the whole region,  
 404 meaning that we have no clear evidence of multiple linked loci in the region.

405

406

407 *Table 2. Overview of significant regions from genome-wide association scans.*

408

| Trait                                 | Chromosome | Lead SNP position | Lead SNP p-value |
|---------------------------------------|------------|-------------------|------------------|
| QCT PC2 'long bone length' (PEN)      | 2          | 55321235          | 4.87E-08         |
| QCT PC2 'long bone length' (JOINT)    | 2          | 55833673          | 2.98E-09         |
| QCT PC3 'low cortical density' (CAGE) | 4          | 73994772          | 2.49E-09         |
| body weight (CAGE)                    | 4          | 75151189          | 1.24E-09         |
| QCT PC2 'long bone length' (CAGE)     | 4          | 75151189          | 1.51E-08         |
| body weight (PEN)                     | 4          | 75748329          | 2.45E-09         |
| body weight (JOINT)                   | 4          | 75748329          | 2.22E-15         |
| QCT PC2 'long bone length' (JOINT)    | 4          | 75748329          | 3.02E-11         |
| body weight (JOINT)                   | 6          | 11477631          | 7.91E-13         |
| QCT PC2 'long bone length' (CAGE)     | 6          | 11477631          | 8.40E-11         |
| QCT PC2 'long bone length' (JOINT)    | 6          | 11477631          | 2.26E-13         |
| body weight (CAGE)                    | 27         | 6070932           | 7.60E-09         |
| body weight (JOINT)                   | 27         | 6087051           | 1.52E-12         |
| QCT PC2 'long bone length' (PEN)      | 27         | 6087051           | 9.52E-09         |
| QCT PC2 'long bone length' (JOINT)    | 27         | 6087051           | 6.62E-11         |

409

410

411



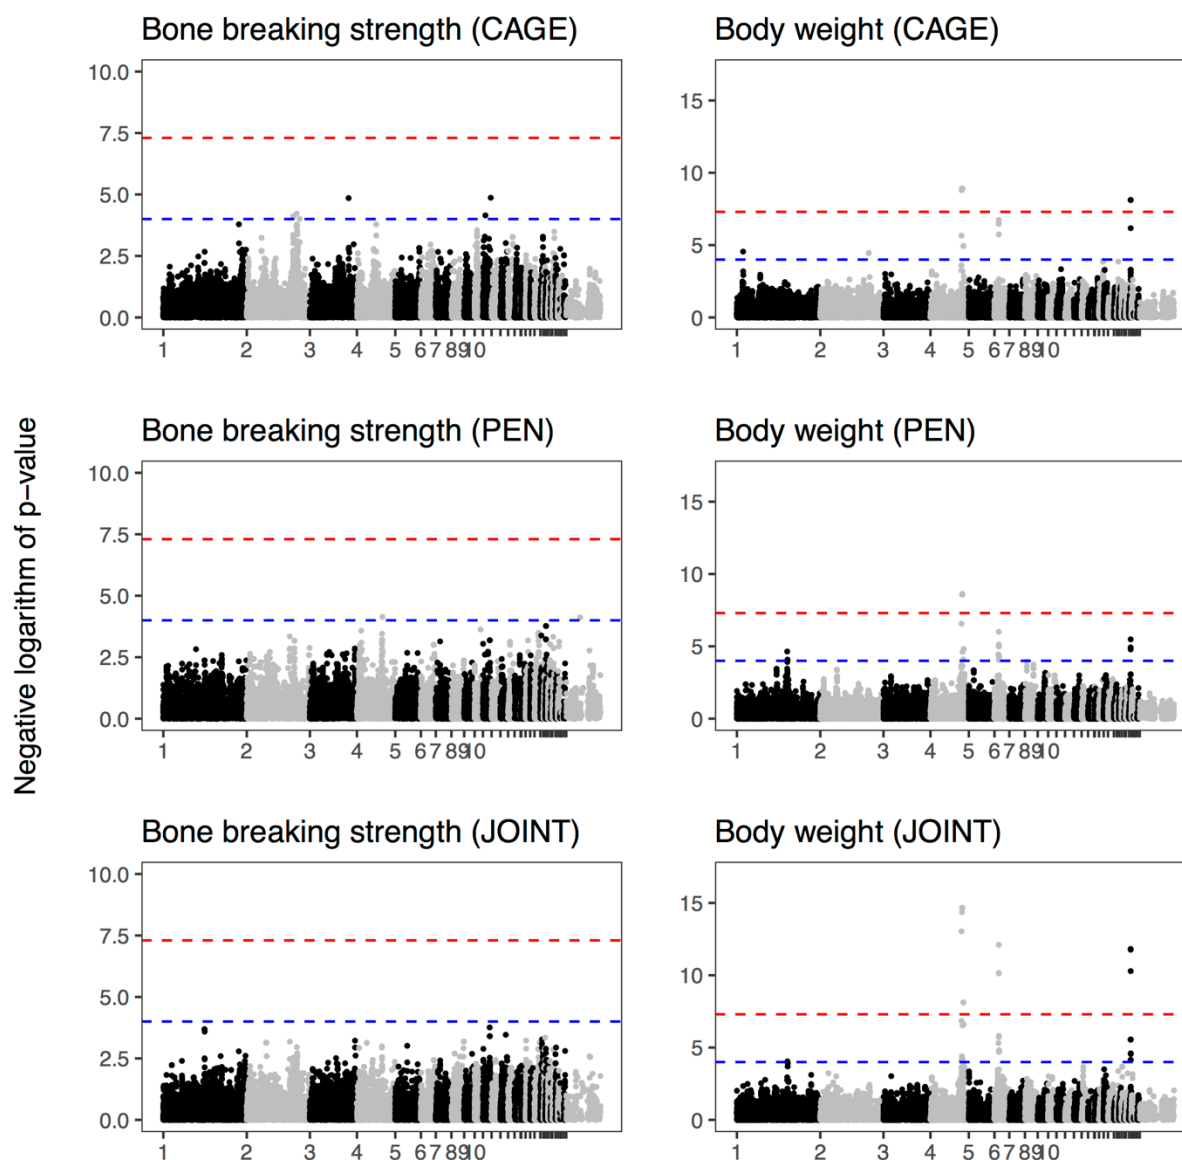

412  
413

414 *Figure 6. Genome-wide association of bone strength and body weight. Manhattan plots*  
415 *from genome-scans of bone strength and body mass, either separating the housing systems*  
416 *or combining them. Bone strength scans included body mass and crossbred, and in the case*  
417 *of the joint scan also housing system, as fixed effects as well as random effects for housing*  
418 *groups (see Methods). Body weight scans included crossbred, and in the joint scan also*  
419 *housing system, as fixed covariates, as well as random effects for housing group.*  
420 *Chromosome names of the smaller chromosomes have been suppressed for legibility. The*  
421 *dashed red line shows a conventional genome-wide significance threshold of  $5 \times 10^{-8}$ , and*  
422 *the dashed blue line a suggestive threshold of  $10^{-4}$ .*

423  
424

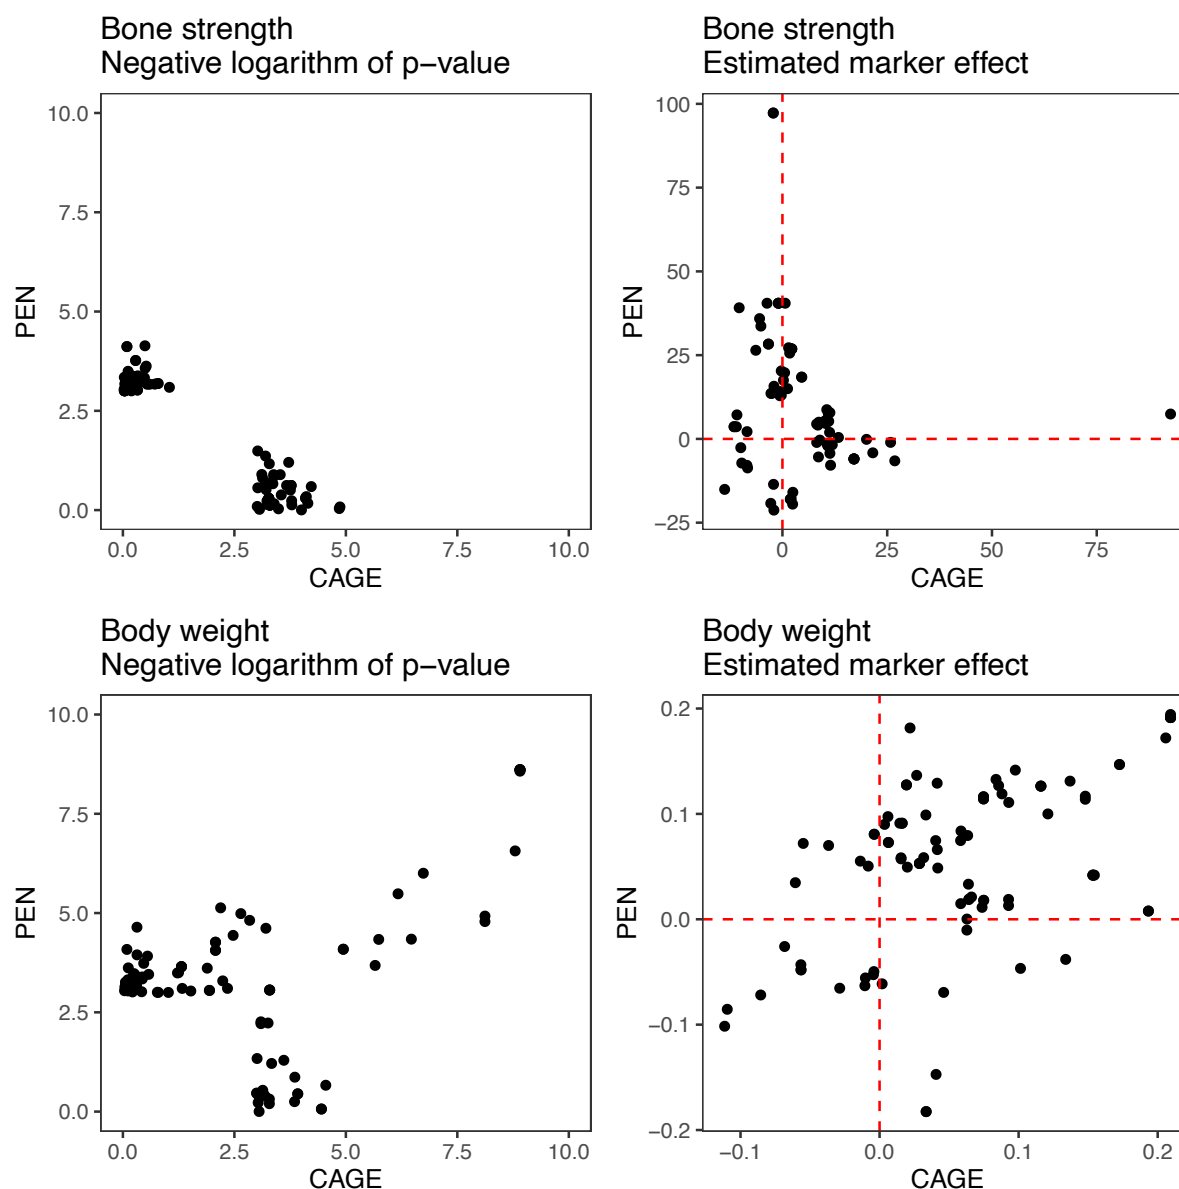

425  
426

427 *Figure 7. Comparison of genetic associations between housing systems. Scatterplots*  
428 *compare the p-values and estimated marker effects of markers with  $p < 10^{-3}$  either in*  
429 *furnished cages or in floor pens.*

430

431 Genetic differences between housing systems

432

433 There was no overlap between the suggestive loci for bone strength in the two housing  
434 systems. Figure 7 compares the p-values and estimated marker effects, using all markers  
435 with  $p < 10^{-3}$  between the floor pen and furnished cage systems. For comparison, we also  
436 show the same scatterplots for the body weight scan, where the loci overlap between  
437 housing systems.

438

439 Genetic correlation estimates between housing systems were too imprecise to be useful.

440 We used a bivariate model with the genomic relationship matrix to estimate genomic

441 heritability and correlation between housing systems. Supplementary Table 4 shows the  
442 estimated genetic correlations and heritabilities from this model.

443

444

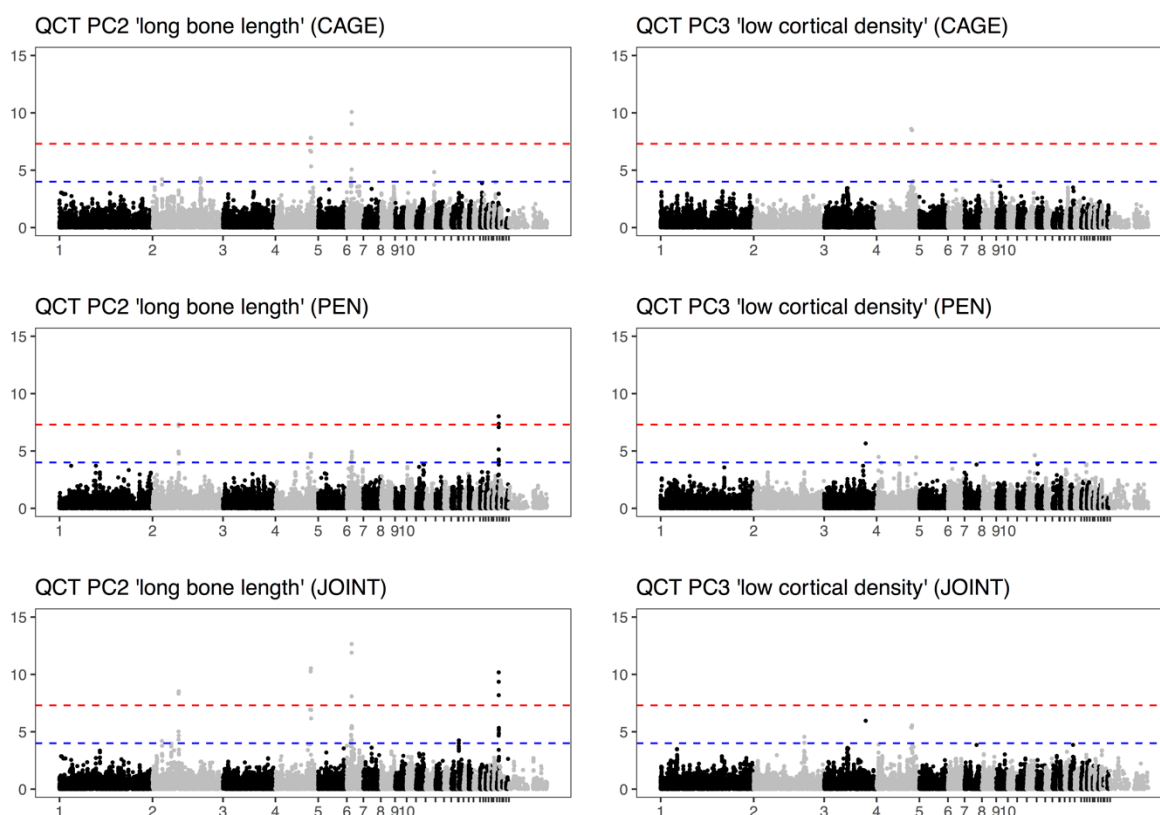

445

446 *Figure 8. Genome-wide association of the second and third principal components of QCT*  
447 *phenotypes, which had significant heritability both housing systems. Genome scans included*  
448 *body mass and crossbred, and in the case of the joint scan also housing system, as fixed*  
449 *effects as well as random effects for housing groups (see Methods). Chromosome names of*  
450 *the smaller chromosomes have been suppressed for legibility. The dashed red line shows a*  
451 *conventional genome-wide significance threshold of  $5 * 10^{-8}$ , and the dashed blue line a*  
452 *suggestive threshold of  $10^{-4}$ .*

453

454

455 Genome-wide association of bone mineral density and bone composition

456

457 Genome-scans for the ten bone mineral density and bone composition phenotypes that had  
458 significant heritability detected five more significant associations and 50 suggestive  
459 associations. Figure 8 show Manhattan plots of QCT phenotypes, which had significant  
460 associations. Supplementary Figures 11 and 12 show Manhattan plots for the genome scans  
461 for thermogravimetric phenotypes that had suggestive associations. Table 2 and  
462 Supplementary Table 5 summarise the location of significant and suggestive regions,  
463 respectively. There were four significant associations for the second principal component of  
464 QCT phenotypes, reflecting bone length (Figure 8). Three of them coincided with the body  
465 weight loci on chromosomes 4, 6 and 27. There was also another significant association on  
466 chromosome 2. The third principal component, reflecting cortical thickness and content,

467 had one significant association, coinciding with the body weight association on chromosome  
468 4.  
469

## 470 Discussion

471  
472 In this paper, we found that bone strength in commercial crossbred laying hens is highly  
473 polygenic and potentially exhibits gene-by-environment interactions between housing  
474 systems that allow different amounts of exercise. We detected no genome-wide significant  
475 loci for bone strength, and the suggestive loci were different between the two  
476 environments. In contrast, we detected three significant body weight loci shared between  
477 environments and coincided with significant loci for bone length. This leads to three topics  
478 for discussion:

- 479 1) differences in bone strength, content and composition between floor pen and  
480 furnished cage housing systems;
- 481 2) evidence for gene-by-environment interaction between housing systems;
- 482 3) candidate genes underlying loci for body weight and bone length.

483  
484

485 The effect of housing system on bone strength, content and composition

486  
487 Our detailed bone phenotyping revealed several differences in bone strength, content and  
488 chemical composition between hens housed in furnished cages and hens housed in floor  
489 pens. The environmental difference between housing systems causes a quantitative  
490 increase in bone strength accompanied by increased bone formation and mineralisation and  
491 in the floor pen system, where the hens are able to exercise more.

492  
493 In addition to greater bone strength, the QCT results show the principal component  
494 containing predominately cortical density, cortical thickness and bone mineral content  
495 being improved in a pen environment. Previous results also demonstrated increased bone  
496 cortical thickness, a lower bone cortical porosity, a larger amount of medullary bone and  
497 overall a greater total bone mass as factors contributing to the greater strength seen in hens  
498 housed in aviary systems that also allowed for greater mobility (Fleming et al., 2006;  
499 Rodriguez-Navarro et al., 2018; Shipov et al., 2010). Also, analysis by thermogravimetry  
500 show that hens housed in floor pens have a higher degree of bone mineralization. The main  
501 traits describing the amount of bone mineralization of cortical and medullary bone  
502 (PO<sub>4</sub>/organic and PO<sub>4</sub>%) were greater in hens housed in floor pens than in furnished cages.  
503 This is consistent with previous results, as the greater opportunity for physical exercise  
504 stimulates bone formation and increases mineralisation of the medullary cavity (Rodriguez-  
505 Navarro et al., 2018; Shipov et al., 2010).

506  
507 On the other hand, hens in floor pens had bone with a greater degree of mineralisation and  
508 a higher carbonate/phosphate ratio than hens housed in cages. A greater degree of  
509 mineralization and lower carbonate/phosphate ratio is indicative of an increased bone  
510 maturity and lower turnover rates reflecting a decreased amount of remodelling of  
511 established bone in hens in floor pens. In contrast, Rodriguez-Navarro et al. (2018) found  
512 that hens with increased mobility had cortical bone with lower degree of mineralisation and

513 higher carbonate/phosphate ratio, suggesting a higher amount of bone remodelling. Thus, it  
514 seems the effect of exercise on bone remodelling and maturation also depends on other  
515 factors, such as age or other environmental variables.

516  
517 This discrepancy in the response of bone to physical activity might be explained by aging  
518 effects, if a higher metabolic activity in pen-housed chickens at an earlier age coincides with,  
519 or even causes, a lower metabolic activity at a later age. The hens in Rodriguez-Navarro et  
520 al. (2018) were 56 weeks old at sampling, while the hens in this study were 100 weeks old;  
521 the differences in bone strength and geometry might have been established at an earlier  
522 ages. Bone metabolism is a dynamic process where what happened earlier in life matters.  
523 For example, bone quality is negatively genetically correlated with age at first egg,  
524 suggesting that early sexual maturation causes worse bone quality later in life (Dunn et al.,  
525 2021). Similarly, whether pullets are reared in cages or in aviaries, allowing for more  
526 movement, has long-term effects on bone properties later in life (Casey-Trott et al., 2017).  
527 This suggests that longitudinal studies of bone mineralisation and remodelling in layer hens  
528 are warranted.

529  
530 As we have observed before, the medullary bone shows more pronounced effects than  
531 cortical bone. Thus, it appears that medullary bone responds to exercise even at older age,  
532 despite contributing less to bone strength than cortical bone. This is in accordance with  
533 previous results: Medullary bone composition had significant heritabilities in white and  
534 brown egg layers (Dunn et al., 2021), and medullary bone has showed increased  $PO_4$ /amide  
535 levels in response to exercise (Rodriguez-Navarro et al., 2018; Shipov et al., 2010). Previous  
536 studies also suggested that the amount of medullary bone was increased by the selection  
537 for better bone quality and by increased physical activity in aviary systems (Fleming et al.,  
538 2006). Medullary bone was clearly more mineralised in both breeds when housed in pens. In  
539 this study, there is little apparent correlation between medullary bone and bone strength,  
540 but other studies have found association between medullary mineralisation and bone  
541 strength (Alfonso-Carrillo et al., 2021; Rodriguez-Navarro et al., 2018). Thus, variation in  
542 medullary bone is an important contributor to variability in bone mineral content and  
543 mechanical properties, both in terms of genetic variation and response to exercise.

544  
545  
546 The evidence for gene-by-environment interaction between housing systems

547  
548 Genome-wide association scans of bone strength gave completely different results between  
549 hens housed in furnished cages and hens housed in floor pens, suggesting that the genetic  
550 basis of bone strength may be different in the two housing systems. There were no  
551 suggestive associations in common between the two housing systems, and little  
552 concordance between estimated marker effects. In combination with evidence for  
553 differences in bone content and composition between housing systems, we hypothesise  
554 that this difference is due to gene-by-environment interaction. That is, the genetic  
555 architectures of bone strength in a furnished cage and in a floor pen are different, likely  
556 because these environments put such different pressures on bone development and  
557 homeostasis. Therefore, the genes involved in bone turnover in response to loading may be  
558 substantially different to those involved in contributing to variance where loading is less.

559

560 On the contrary, the genome-wide association results for body weight were consistent  
561 between the housing systems. This similarity suggests that the genetic variants that affect  
562 growth, at least at the three loci detected in this study, do not interact with the housing  
563 system. At the same time, there was little difference in body weight between hens in the  
564 two housing systems.

565  
566 Low power to detect associations is unlikely to explain this pattern of gene-by-environment  
567 interaction. A previous genome-wide association study in a homogenous group of 750 pure  
568 line hens detected several strong associations for bone strength (Raymond et al., 2018). The  
569 pure line hens were from the Lohmann breeding program, and therefore closely related to  
570 one of the crossbreds used in the current study. Thus, a study of this size would likely be  
571 powered to detect loci for bone mineral density in the absence of gene-by-environment  
572 interaction, as it is with loci for body weight that are shared between environments.  
573 Therefore, the lack of shared associations for bone strength between housing systems are  
574 unlikely to be explained by low power to detect them. If the previously known loci had  
575 similar effects in both environments, we should be able to detect them. For context,  
576 estimated additive genetic effects detected by Raymond et al., (2018) range from 11 to 33  
577 N, which is comparable to the additive effects estimated within housing system in this study  
578 (ranging from 7 to 21 N). These effects can be compared to the average difference between  
579 housing systems, which is 65 N.

580  
581

582 Candidate genes for body weight and bone length

583

584 The body weight loci on chromosomes 4, 6, and 27 overlap loci reported in several previous  
585 genetic mapping studies. The regions overlap several compelling candidate genes for body  
586 weight in chickens, which is also reflected in enrichment of body weight and feed  
587 conversion associations from Chicken QTLdb (Supplementary figure 13). This includes  
588 studies within laying hen populations where the same region on chromosome 4 was seen to  
589 also have pleiotropic effects on a wide range of traits including egg quality traits (Wolc et  
590 al., 2014).

591

592 Two different loci for body weight overlapping our chromosome 4 locus have been fine  
593 mapped down to regions of one or a few candidate genes. A series of genetic mapping  
594 studies (Lyu et al., 2018, 2017; Nassar et al., 2015) detected and progressively fine-mapped  
595 a region containing 15 genes, including *Ligand dependent nuclear receptor corepressor like*  
596 (*LCORL*; *ENSGALG00000014421*) and *Condensin complex subunit 3* (*NCAPG*;  
597 *ENSGALG00000014425*). This locus is also associated with body size traits in humans  
598 (Weedon et al., 2008), cattle (Bouwman et al., 2018) and horses (Makvandi-Nejad et al.,  
599 2012). The other locus was detected by (Sewalem et al., 2002) and fine mapped to  
600 *Cholecystokinin receptor type A* (*CCKAR*; *ENSGALG00000030801*), and was shown to alter  
601 the expression of the *CCKAR* gene and the physiological response of the animals to its ligand  
602 CCK (Dunn et al., 2013). The associated region found in this study overlaps both of these  
603 regions. One or both of them might contribute to the association; due to linkage  
604 disequilibrium, we cannot tell them apart. We confirmed this by a conditional genome-wide  
605 association scan, where adding the lead SNP as a covariate abolished the association signal  
606 throughout the region. This suggests that linkage disequilibrium throughout the region



607 prevents us from genetically dissecting it further in this population. This region appears to  
608 be a hotspot of genetic effects on body weight, or perhaps more correctly stature, across a  
609 large range of animals, with pleiotropic effects on other traits.

610  
611 The two most significant associations on chromosome 27 fall in the *insulin-like growth*  
612 *factor 2 mRNA binding protein 1* gene (*IGF2BP1*; *ENSGALG00000041204*). *IGF2BP1* is known  
613 to be expressed in developing limbs and has been shown to alter the length of chick long  
614 bones (Fisher et al., 2005) which could ultimately affect stature. The *IGF2BP1* locus has been  
615 highlighted previously in a GWAS study in a population of laying type chicken which  
616 included white leghorns genetics and affected a range of carcass traits including feet  
617 weight with effects up to 4.78% of the variance (Ma et al., 2019). The study also  
618 demonstrated the region between *CCKAR* and *NACPG* as important for carcass traits as in  
619 this study. Expression of *IGF2BP1* is also associated with adipogenesis in chickens (Chen et  
620 al., 2019). This association is also close to bone candidate gene *sclerotin* (*SOST*;  
621 *ENSGALG00000009929*), located about 150 kbp away. Sclerotin is a negative regulator of  
622 bone formation that is expressed in osteocytes (van Bezooijen et al., 2005); loss-of-function  
623 mutations in humans cause bone overgrowth (sclerosteosis). Guo et al. (2017) report an  
624 association with femoral bone mineral content and femoral weight in this region,  
625 highlighting *SOST* as a candidate gene. For femoral weight on their lead SNP occurs close to  
626 *IGF2BP1*, while their lead SNP for bone mineral content is closest to *SOST*.

627  
628 We detected significant loci associated with bone length coinciding with the major body  
629 weight loci, despite including body weight as a covariate in the bone length genome scan.  
630 This may be an artefact of a non-linear relationship between body weight and bone length,  
631 or a genuinely pleiotropic effect on bone length. However, there was one association for  
632 bone length independent of body weight on chromosome 2. The closest gene was *succinyl-*  
633 *CoA:glutarate-CoA transferase* (*SUGCT*; *ENSGALG00000031758*). This gene encodes a  
634 mitochondrial enzyme that is associated with glutaric aciduria in humans, but appears to  
635 have no known connection to bone or to body size traits.

636  
637

## 638 Conclusion

639  
640 The current study yet again establishes the positive effects of systems that allow greater  
641 movement of laying hens on bone quality, and that these beneficial effects can also be seen  
642 in old hens (100 weeks of age). If the unintended consequences of increased collisions in  
643 such systems can be reduced by improved design, then the combination of environment,  
644 nutrition and genetics, taking in to account what we have learned in this study about  
645 environment interactions, then the risk of fracture in laying hens could be minimised.  
646 Knowledge acquired in this study could help in moving to selection strategies aimed to  
647 reduce the incidence of bone damage in laying hens in systems that allow greater mobility.  
648 This might include the use of whole genome selection strategies, even if individual loci that  
649 explained large amounts of variance were not detected for bone quality. This could allow  
650 phenotypes gathered in extensively housed hens be applied to pedigree hens, which may  
651 need to be selected in a cage environment for egg laying performance. This could  
652 conceivably be achieved by genomic selection or by sib selection.

653

## 654 Acknowledgements

655

656 The work was supported by Formas – a Swedish Research Council for Sustainable  
657 Development projects 2012-1342, 2014-01840 (ERA-NET), and 2016-01386; by the  
658 Biotechnology and Biological Sciences Research Council; UK grant ‘Better Bones’  
659 BB/M028291/1 (ERA-NET); and Investigación y Tecnología Agraria y Alimentaria 291815.

660

## 661 References

662

663 Abrahamsson, P., Tauson, R., 1993. Effect of perches at different positions in conventional  
664 cages for laying hens of two different strains. *Acta Agriculturae Scandinavica, Section A-*  
665 *Animal Science* 43, 228–235.

666 Aguado, E., Pascaretti-Grizon, F., Goyenvalle, E., Audran, M., Chappard, D., 2015. Bone mass  
667 and bone quality are altered by hypoactivity in the chicken. *PLoS One* 10, e0116763.

668 Alfonso-Carrillo, C., Benavides-Reyes, C., de Los Mozos, J., Dominguez-Gasca, N., Sanchez-  
669 Rodríguez, E., Garcia-Ruiz, A.I., Rodriguez-Navarro, A.B., 2021. Relationship between Bone  
670 Quality, Egg Production and Eggshell Quality in Laying Hens at the End of an Extended  
671 Production Cycle (105 Weeks). *Animals* 11, 623.

672 Bishop, S., Fleming, R., McCormack, H., Flock, D., Whitehead, C., 2000. Inheritance of bone  
673 characteristics affecting osteoporosis in laying hens. *British Poultry Science* 41, 33–40.

674 Bouwman, A.C., Daetwyler, H.D., Chamberlain, A.J., Ponce, C.H., Sargolzaei, M., Schenkel,  
675 F.S., Sahana, G., Govignon-Gion, A., Boitard, S., Dolezal, M., 2018. Meta-analysis of genome-  
676 wide association studies for cattle stature identifies common genes that regulate body size  
677 in mammals. *Nature genetics* 50, 362–367.

678 Casey-Trott, T., Korver, D., Guerin, M., Sandilands, V., Torrey, S., Widowski, T., 2017.  
679 Opportunities for exercise during pullet rearing, Part II: Long-term effects on bone  
680 characteristics of adult laying hens at the end-of-lay. *Poultry Science* 96, 2518–2527.

681 Chen, J., Ren, X., Li, L., Lu, S., Chen, T., Tan, L., Liu, M., Luo, Q., Liang, S., Nie, Q., 2019.  
682 Integrative Analyses of mRNA Expression Profile Reveal the Involvement of IGF2BP1 in  
683 Chicken Adipogenesis. *International journal of molecular sciences* 20, 2923.

684 Cransberg, P., Parkinson, G., Wilson, S., Thorp, B., 2001. Sequential studies of skeletal  
685 calcium reserves and structural bone volume in a commercial layer flock. *British poultry*  
686 *science* 42, 260–265.

687 Dunn, I., Fleming, R., McCormack, H., Morrice, D., Burt, D., Preisinger, R., Whitehead, C.,  
688 2007. A QTL for osteoporosis detected in an F2 population derived from White Leghorn  
689 chicken lines divergently selected for bone index. *Animal genetics* 38, 45–49.

690 Dunn, I.C., De Koning, D.-J., McCormack, H.A., Fleming, R.H., Wilson, P.W., Andersson, B.,  
691 Schmutz, M., Benavides, C., Dominguez-Gasca, N., Sanchez-Rodriguez, E., 2021. No evidence

- 692 that selection for egg production persistency causes loss of bone quality in laying hens.  
693 *Genetics Selection Evolution* 53, 1–13.
- 694 Dunn, I.C., Meddle, S.L., Wilson, P.W., Wardle, C.A., Law, A.S., Bishop, V.R., Hindar, C.,  
695 Robertson, G.W., Burt, D.W., Ellison, S.J., 2013. Decreased expression of the satiety signal  
696 receptor CCKAR is responsible for increased growth and body weight during the  
697 domestication of chickens. *American Journal of Physiology-Endocrinology and Metabolism*  
698 304, E909–E921.
- 699 Fisher, M.C., Meyer, C., Garber, G., Dealy, C.N., 2005. Role of IGFBP2, IGF-I and IGF-II in  
700 regulating long bone growth. *Bone* 37, 741–750.
- 701 Fleming, R., McCormack, H., McTeir, L., Whitehead, C., 2006. Relationships between genetic,  
702 environmental and nutritional factors influencing osteoporosis in laying hens. *British Poultry*  
703 *Science* 47, 742–755.
- 704 Fleming, R., Whitehead, C., Alvey, D., Gregory, N., Wilkins, L., 1994. Bone structure and  
705 breaking strength in laying hens housed in different husbandry systems. *British poultry*  
706 *science* 35, 651–662.
- 707 Fonseca, P.A., Suárez-Vega, A., Marras, G., Cánovas, Á., 2020. GALLO: An R package for  
708 genomic annotation and integration of multiple data sources in livestock for positional  
709 candidate loci. *GigaScience* 9, giaa149.
- 710 González-Cerón, F., Rekaya, R., Aggrey, S., 2015. Genetic analysis of bone quality traits and  
711 growth in a random mating broiler population. *Poultry science* 94, 883–889.
- 712 Gregory, N., Wilkins, L., Eleperuma, S., Ballantyne, A., Overfield, N., 1990. Broken bones in  
713 domestic fowls: Effect of husbandry system and stunning method in end-of-lay hens. *British*  
714 *Poultry Science* 31, 59–69.
- 715 Guo, J., Sun, C., Qu, L., Shen, M., Dou, T., Ma, M., Wang, K., Yang, N., 2017. Genetic  
716 architecture of bone quality variation in layer chickens revealed by a genome-wide  
717 association study. *Scientific reports* 7, 45317.
- 718 Hester, P., Enneking, S., Haley, B., Cheng, H.W., Einstein, M., Rubin, D., 2013. The effect of  
719 perch availability during pullet rearing and egg laying on musculoskeletal health of caged  
720 White Leghorn hens. *Poultry Science* 92, 1972–1980.
- 721 Hothorn, T., Bretz, F., Westfall, P., 2008. Simultaneous inference in general parametric  
722 models. *Biometrical Journal: Journal of Mathematical Methods in Biosciences* 50, 346–363.
- 723 Hu, Z.-L., Park, C.A., Reecy, J.M., 2015. Developmental progress and current status of the  
724 Animal QTLdb. *Nucleic acids research* 44, D827–D833.
- 725 Jendral, M., Korver, D., Church, J., Feddes, J., 2008. Bone mineral density and breaking  
726 strength of white leghorns housed in conventional, modified, and commercially available  
727 colony battery cages. *Poultry science* 87, 828–837.
- 728 Johnsson, M., Jonsson, K.B., Andersson, L., Jensen, P., Wright, D., 2015. Genetic regulation

- 729 of bone metabolism in the chicken: similarities and differences to mammalian systems. *PLoS*  
730 *genetics* 11, e1005250.
- 731 Kent, W.J., 2002. BLAT—the BLAST-like alignment tool. *Genome research* 12, 656–664.
- 732 Lee, S., Yang, J., Goddard, M., Visscher, P., Wray, N., 2012. Estimation of pleiotropy between  
733 complex diseases using SNP-derived genomic relationships and restricted maximum  
734 likelihood. *Bioinformatics* 28, 2540–2542.
- 735 Leyendecker, M., Hamann, H., Hartung, J., Kamphues, J., Neumann, U., Sürrie, C., Distl, O.,  
736 2005. Keeping laying hens in furnished cages and an aviary housing system enhances their  
737 bone stability. *British Poultry Science* 46, 536–544.
- 738 Lyu, S., Arends, D., Nassar, M., Brockmann, G., 2017. Fine mapping of a distal chromosome 4  
739 QTL affecting growth and muscle mass in a chicken advanced intercross line. *Animal*  
740 *genetics* 48, 295–302.
- 741 Lyu, S., Arends, D., Nassar, M., Weigend, A., Weigend, S., Preisinger, R., Brockmann, G.,  
742 2018. Reducing the interval of a growth QTL on chromosome 4 in laying hens. *Animal*  
743 *genetics* 49, 467–471.
- 744 Ma, M., Shen, M., Qu, L., Dou, T., Guo, J., Hu, Y., Lu, J., Li, Y., Wang, X., Wang, K., 2019.  
745 Genome-wide association study for carcass traits in spent hens at 72 weeks old. *Italian*  
746 *Journal of Animal Science* 18, 261–266.
- 747 Makvandi-Nejad, S., Hoffman, G.E., Allen, J.J., Chu, E., Gu, E., Chandler, A.M., Loredó, A.I.,  
748 Bellone, R.R., Mezey, J.G., Brooks, S.A., 2012. Four loci explain 83% of size variation in the  
749 horse. *PLoS One* 7, e39929.
- 750 Mignon-Grasteau, S., Chantry-Darmon, C., Boscher, M.-Y., Sellier, N., Chabault-Dhuit, M., Le  
751 Bihan-Duval, E., Narcy, A., 2016. Genetic determinism of bone and mineral metabolism in  
752 meat-type chickens: A QTL mapping study. *Bone reports* 5, 43–50.
- 753 Nassar, M., Goraga, Z., Brockmann, G., 2015. Quantitative trait loci segregating in crosses  
754 between New Hampshire and White Leghorn chicken lines: IV. Growth performance. *Animal*  
755 *genetics* 46, 441–446.
- 756 Newman, S., Leeson, S., 1998. Effect of housing birds in cages or an aviary system on bone  
757 characteristics. *Poultry science* 77, 1492–1496.
- 758 Pufall, A., Harlander-Matauschek, A., Hunniford, M., Widowski, T.M., 2021. Effects of  
759 Rearing Aviary Style and Genetic Strain on the Locomotion and Musculoskeletal  
760 Characteristics of Layer Pullets. *Animals* 11. <https://doi.org/10.3390/ani11030634>
- 761 R Core Team, 2017. R: A Language and Environment for Statistical Computing. R Foundation  
762 for Statistical Computing, Vienna, Austria.
- 763 Raymond, B., Johansson, A.M., McCormack, H.A., Fleming, R.H., Schmutz, M., Dunn, I.C., De  
764 Koning, D.J., 2018. Genome-wide association study for bone strength in laying hens. *Journal*  
765 *of Animal Science* 96, 2525–2535.

- 766 Rodenburg, T., Tuytens, F., De Reu, K., Herman, L., Zoons, J., Sonck, B., 2008. Welfare  
767 assessment of laying hens in furnished cages and non-cage systems: an on-farm  
768 comparison. *Animal Welfare* 17, 363–373.
- 769 Rodriguez-Navarro, A., McCormack, H., Fleming, R., Alvarez-Lloret, P., Romero-Pastor, J.,  
770 Dominguez-Gasca, N., Prozorov, T., Dunn, I., 2018. Influence of physical activity on tibial  
771 bone material properties in laying hens. *Journal of structural biology* 201, 36–45.
- 772 Rönnegård, L., McFarlane, S.E., Husby, A., Kawakami, T., Ellegren, H., Qvarnström, A., 2016.  
773 Increasing the power of genome wide association studies in natural populations using  
774 repeated measures—evaluation and implementation. *Methods in ecology and evolution* 7,  
775 792–799.
- 776 Rönnegård, L., Shen, X., Alam, M., 2010. hglm: A package for fitting hierarchical generalized  
777 linear models. *The R Journal* 2, 20–28.
- 778 Rubin, C., Brändström, H., Wright, D., Kerje, S., Gunnarsson, U., Schutz, K., Fredriksson, R.,  
779 Jensen, P., Andersson, L., Ohlsson, C., 2007. Quantitative trait loci for BMD and bone  
780 strength in an intercross between domestic and wildtype chickens. *Journal of Bone and*  
781 *Mineral Research* 22, 375–384.
- 782 Sewalem, A., Morrice, D., Law, A., Windsor, D., Haley, C., Ikeobi, C., Burt, D., Hocking, P.,  
783 2002. Mapping of quantitative trait loci for body weight at three, six, and nine weeks of age  
784 in a broiler layer cross. *Poultry Science* 81, 1775–1781.
- 785 Shipov, A., Sharir, A., Zelzer, E., Milgram, J., Monsonogo-Ornan, E., Shahar, R., 2010. The  
786 influence of severe prolonged exercise restriction on the mechanical and structural  
787 properties of bone in an avian model. *The Veterinary Journal* 183, 153–160.
- 788 van Bezooijen, R.L., ten Dijke, P., Papapoulos, S.E., Löwik, C.W., 2005. SOST/sclerostin, an  
789 osteocyte-derived negative regulator of bone formation. *Cytokine & growth factor reviews*  
790 16, 319–327.
- 791 Wall, H., Boyner, M., de Koning, D.-J., Kindmark, A., McCormack, H.A., Fleming, R.H., Lopes  
792 Pinto, F., Tauson, R., n.d. Long life layers – mortality, integument and skeletal strength in  
793 two housing systems as influenced by layer genotype and dietary zinc source. In review  
794 2021.
- 795 Weedon, M.N., Lango, H., Lindgren, C.M., Wallace, C., Evans, D.M., Mangino, M., Freathy,  
796 R.M., Perry, J.R., Stevens, S., Hall, A.S., 2008. Genome-wide association analysis identifies 20  
797 loci that influence adult height. *Nature genetics* 40, 575.
- 798 Wilkins, L., McKinstry, J., Avery, N., Knowles, T., Brown, S., Tarlton, J., Nicol, C., 2011.  
799 Influence of housing system and design on bone strength and keel bone fractures in laying  
800 hens. *Veterinary Record*.
- 801 Wilson, S., Duff, S., Whitehead, C., 1992. Effects of age, sex and housing on the trabecular  
802 bone of kaying strain domestic fowl. *Research in veterinary science* 53, 52–58.

803 Wolc, A., Arango, J., Jankowski, T., Dunn, I., Settar, P., Fulton, J., O'sullivan, N., Preisinger, R.,  
804 Fernando, R., Garrick, D., 2014. Genome-wide association study for egg production and  
805 quality in layer chickens. *Journal of Animal Breeding and Genetics* 131, 173–182.

806

807

808



809 Supplementary figures

810

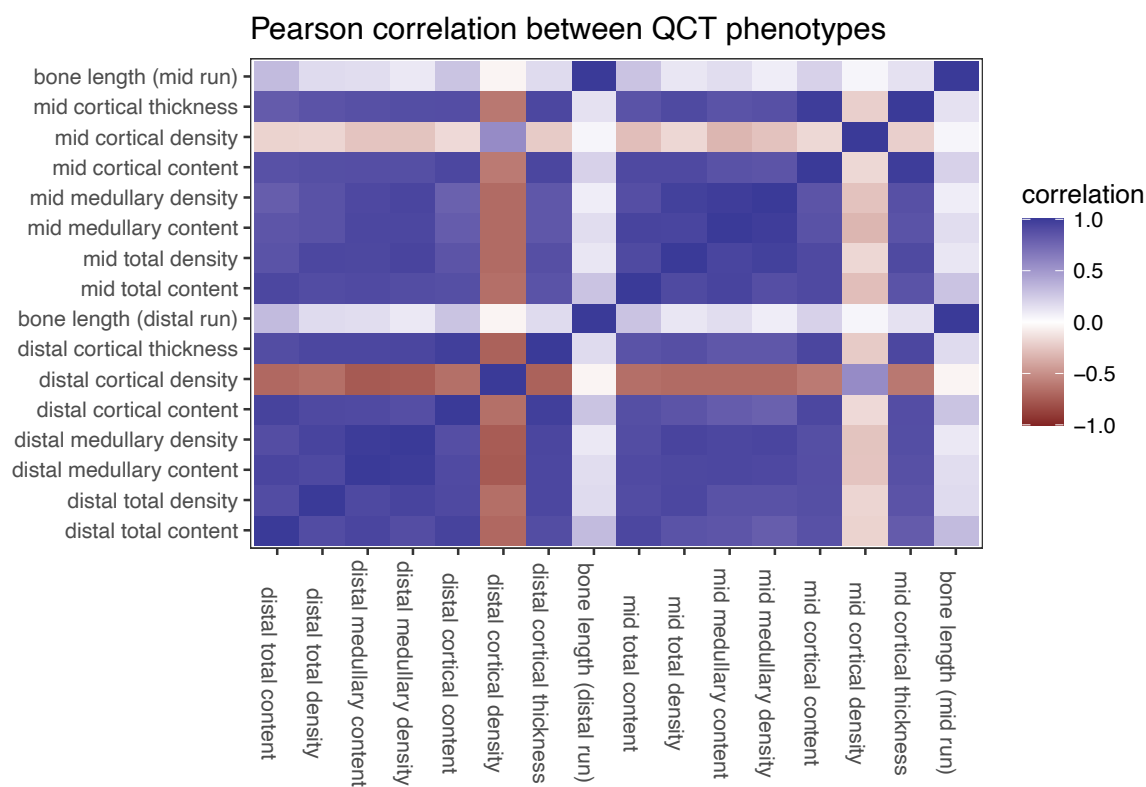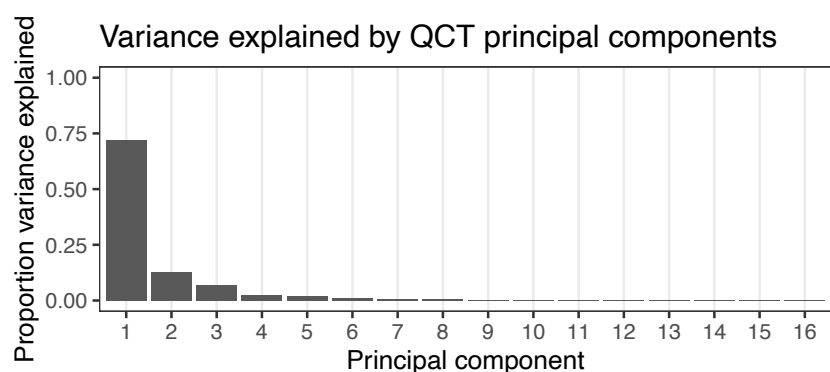

811

812

813 Supplementary Figure 1. Correlation heatmap and variance explained by principal

814 components of QCT phenotypes.

815

816

### Principal component loadings

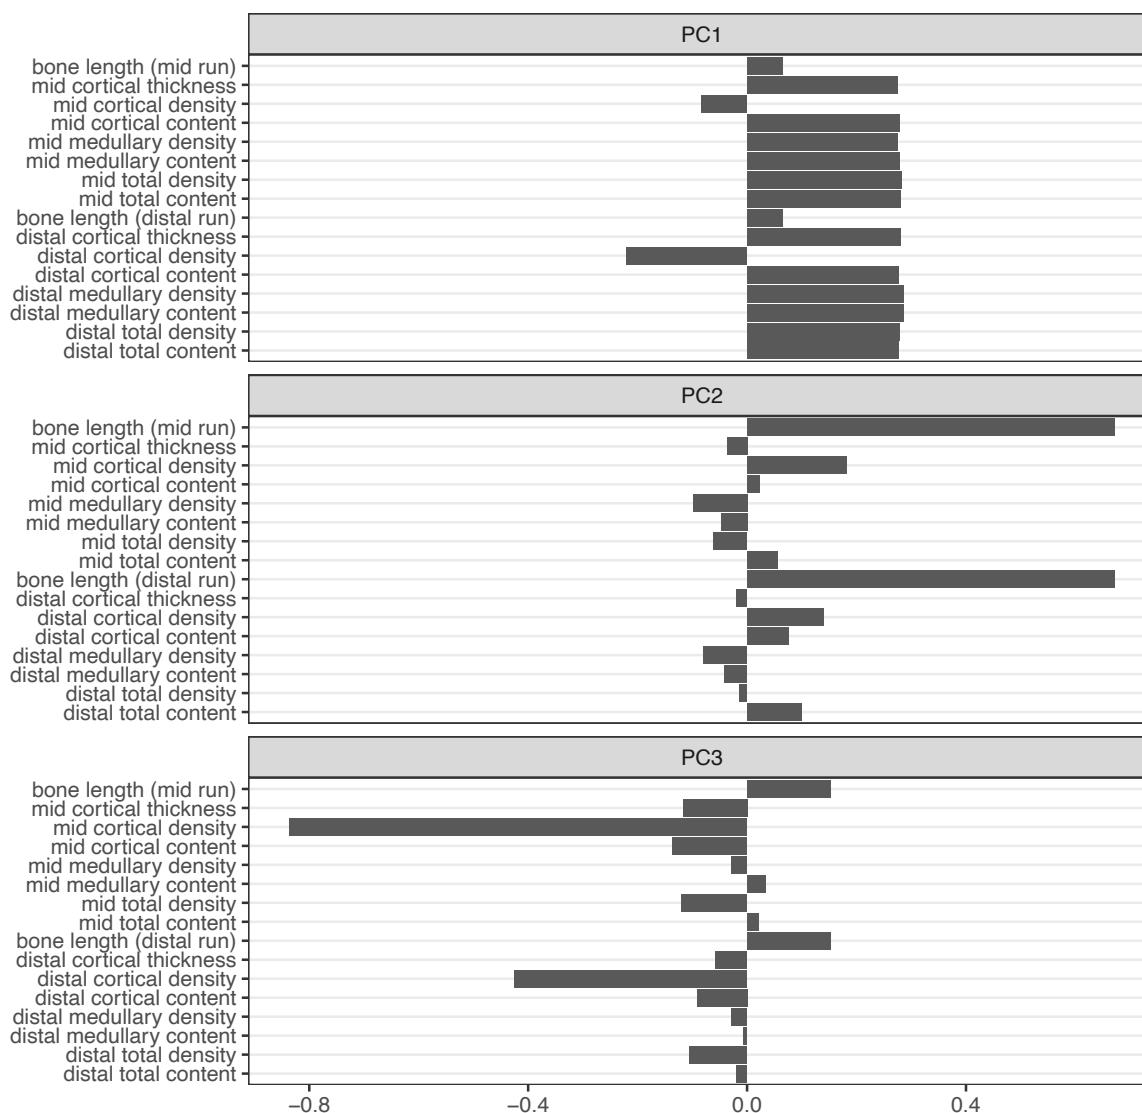

817

818

819 Supplementary Figure 2. Loadings on the first three principal components of the QCT  
820 phenotypes, showing how the first captures most density and content variables, the second  
821 tibial bone length, and the third cortical density.

822

823

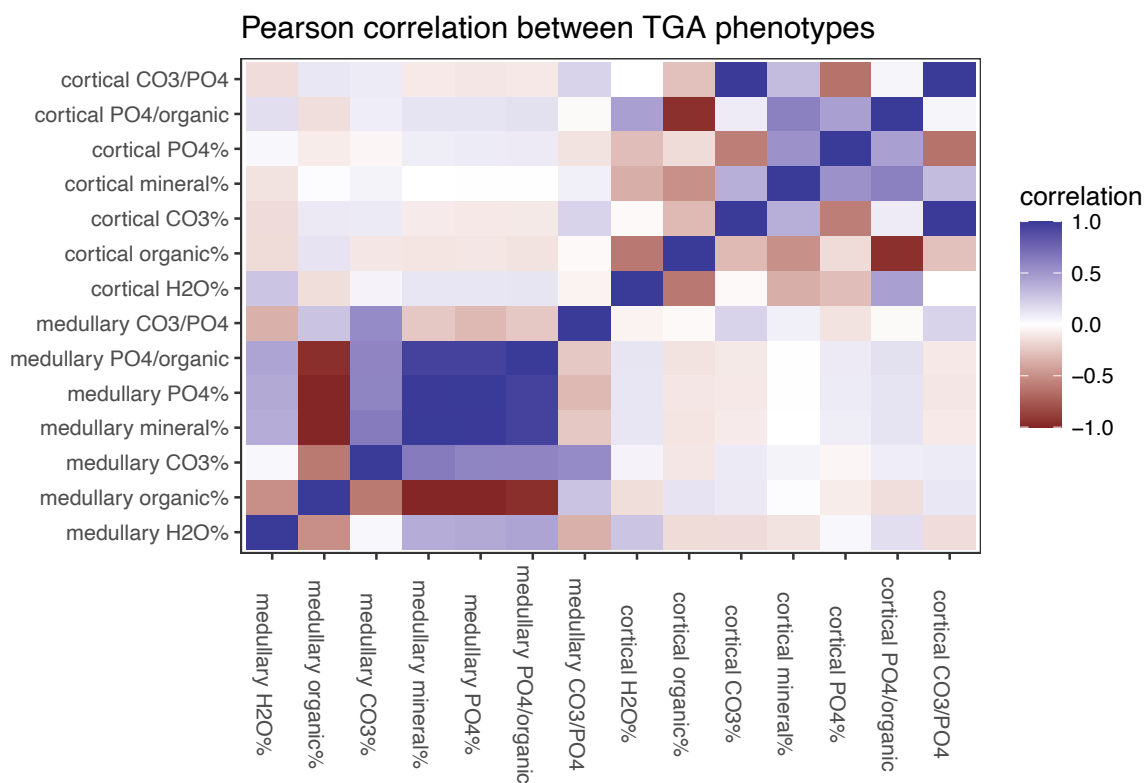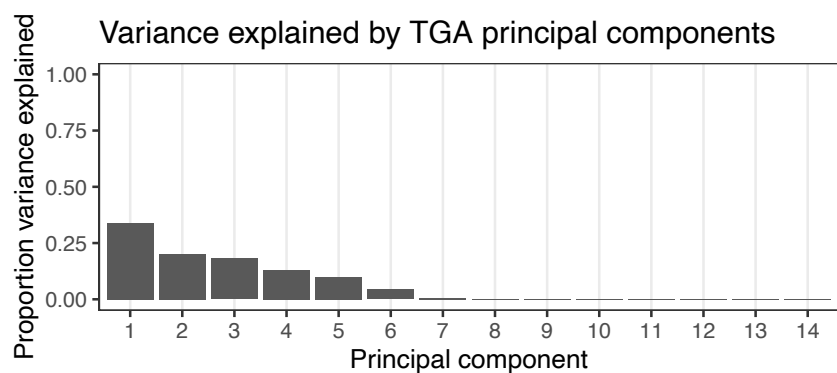

824

825 Supplementary Figure 3. Correlation heatmap and variance explained by principal

826 components of TGA phenotypes.

827

### Difference between housing systems (cage minus pen)

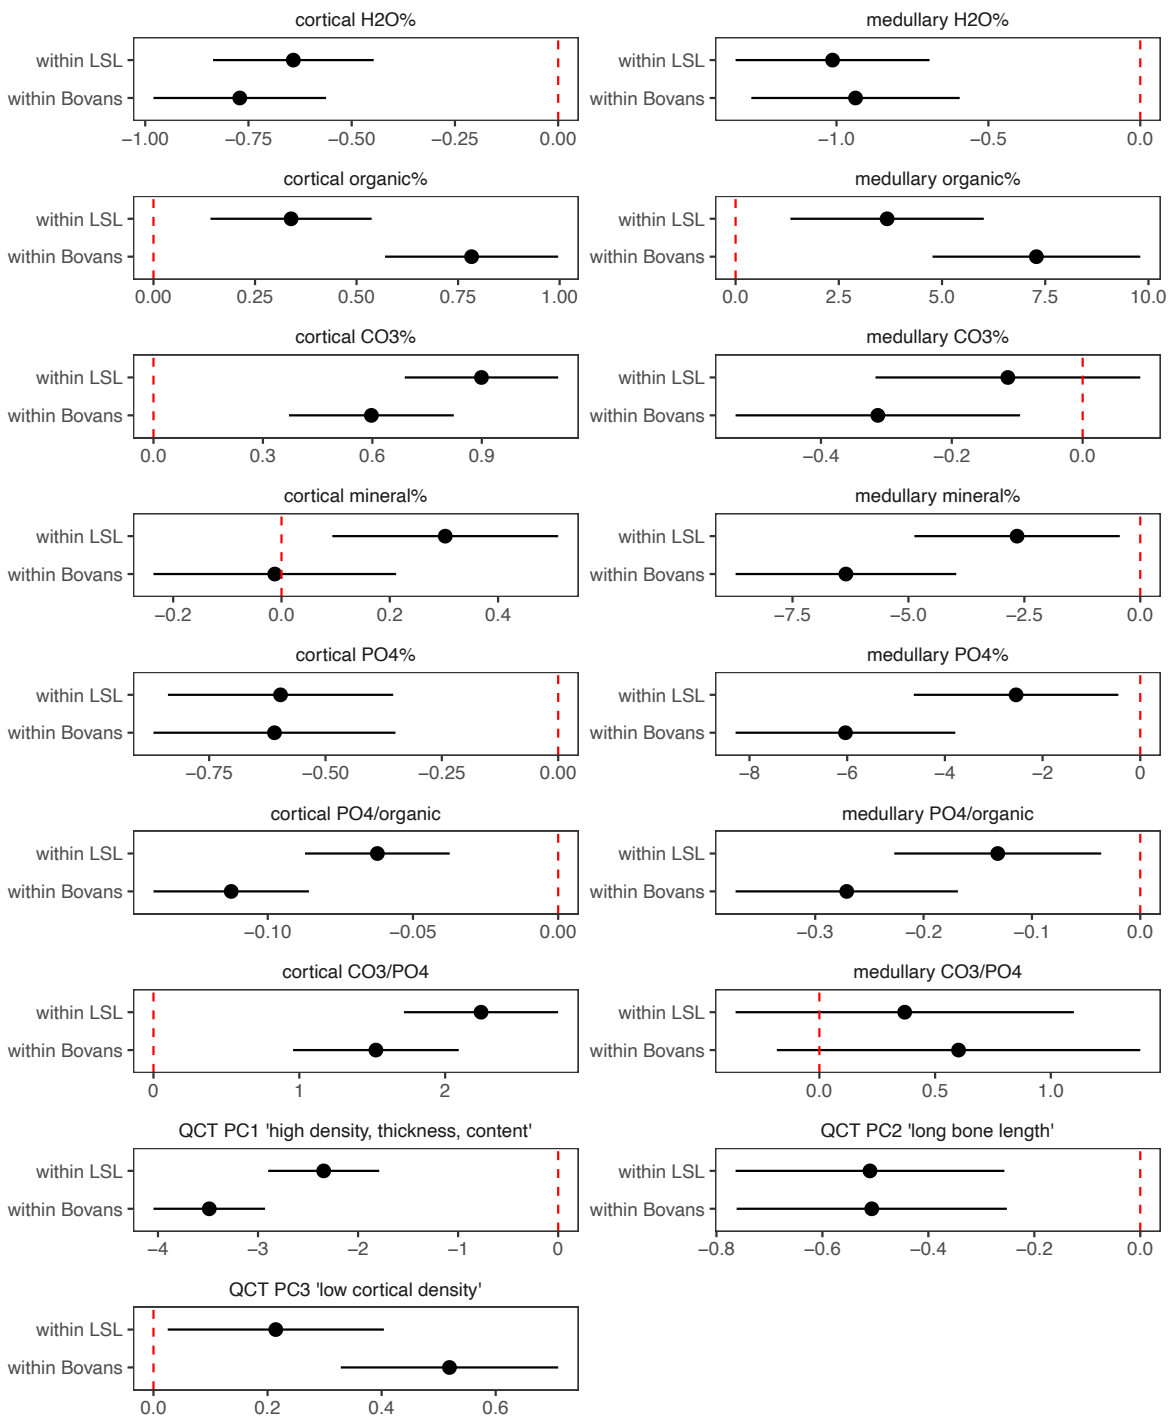

828

829 Supplementary Figure 4. Differences in bone phenotypes between housing systems.

830 Estimates of differences between housing systems and crossbreds from a linear model  
831 including housing system, breed and an interaction term. Differences are expressed a linear  
832 contrast between housing systems (cage minus pen) within the two crossbreds (LSL and  
833 Bovans). Thus, positive values mean that trait values are higher, on average, in furnished  
834 cages than in floor pens, and vice versa. The red dashed line indicates zero; intervals that do  
835 not overlap this line are significantly different from zero.

836

837

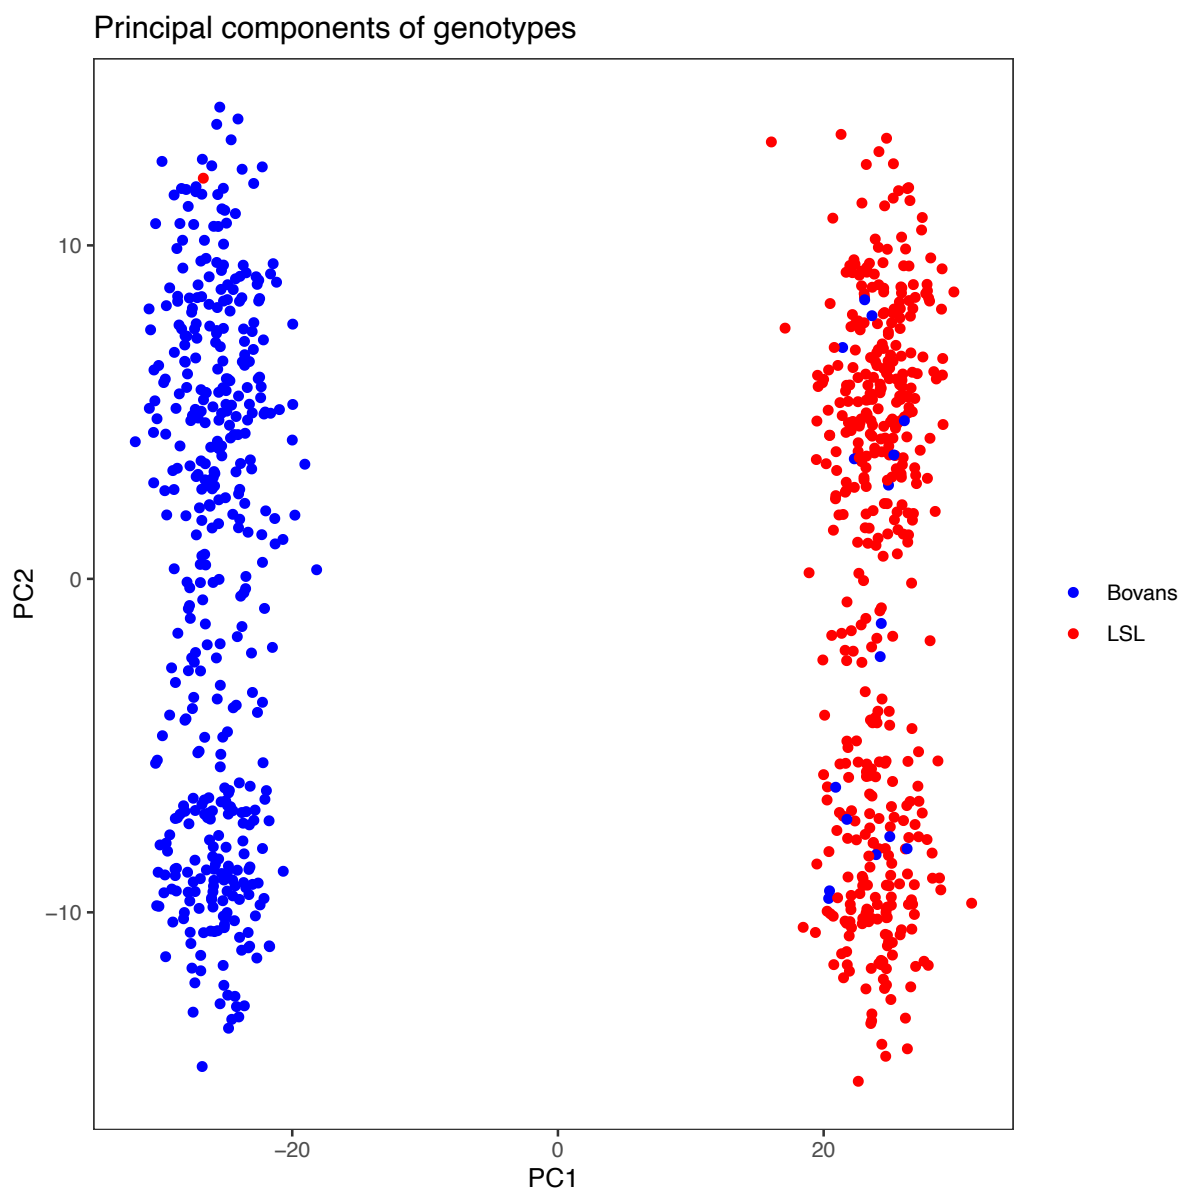

838

839

840 Supplementary Figure 5. The first principal component separates the two crossbreds.

841 Scatterplot of the first two principal components of the genotypes, coloured by the

842 crossbred. 19 individuals appeared to be recorded as the wrong crossbred based on the

843 position the plot, and were excluded.

844

845

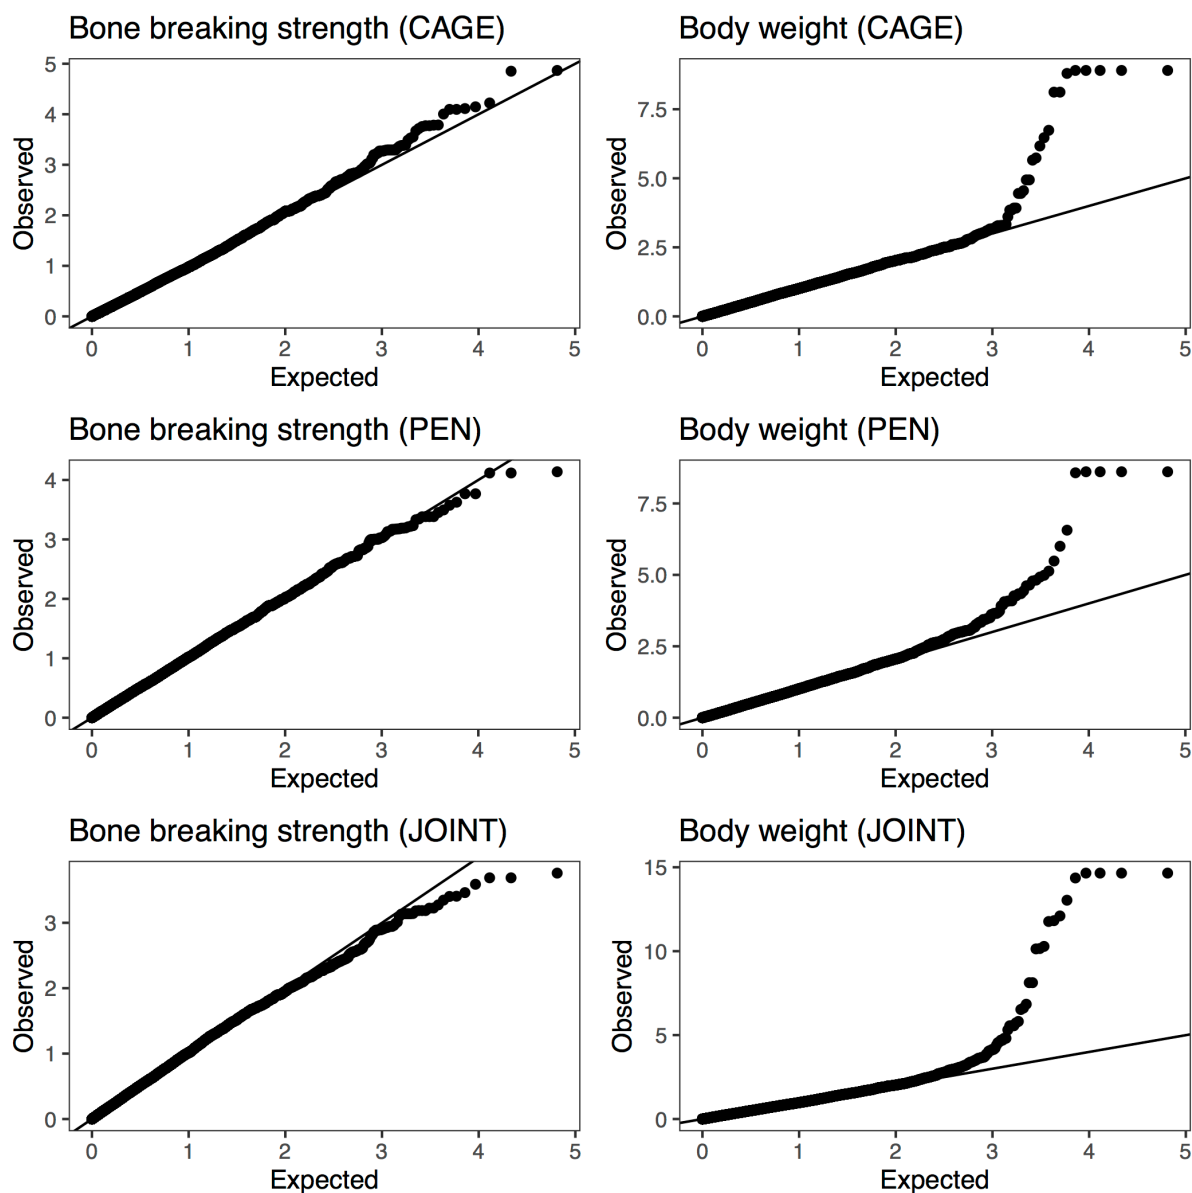

846

847

848 Supplementary Figure 6. Quantile—quantile plots of genome scans for bone breaking

849 strength and body weight.

850



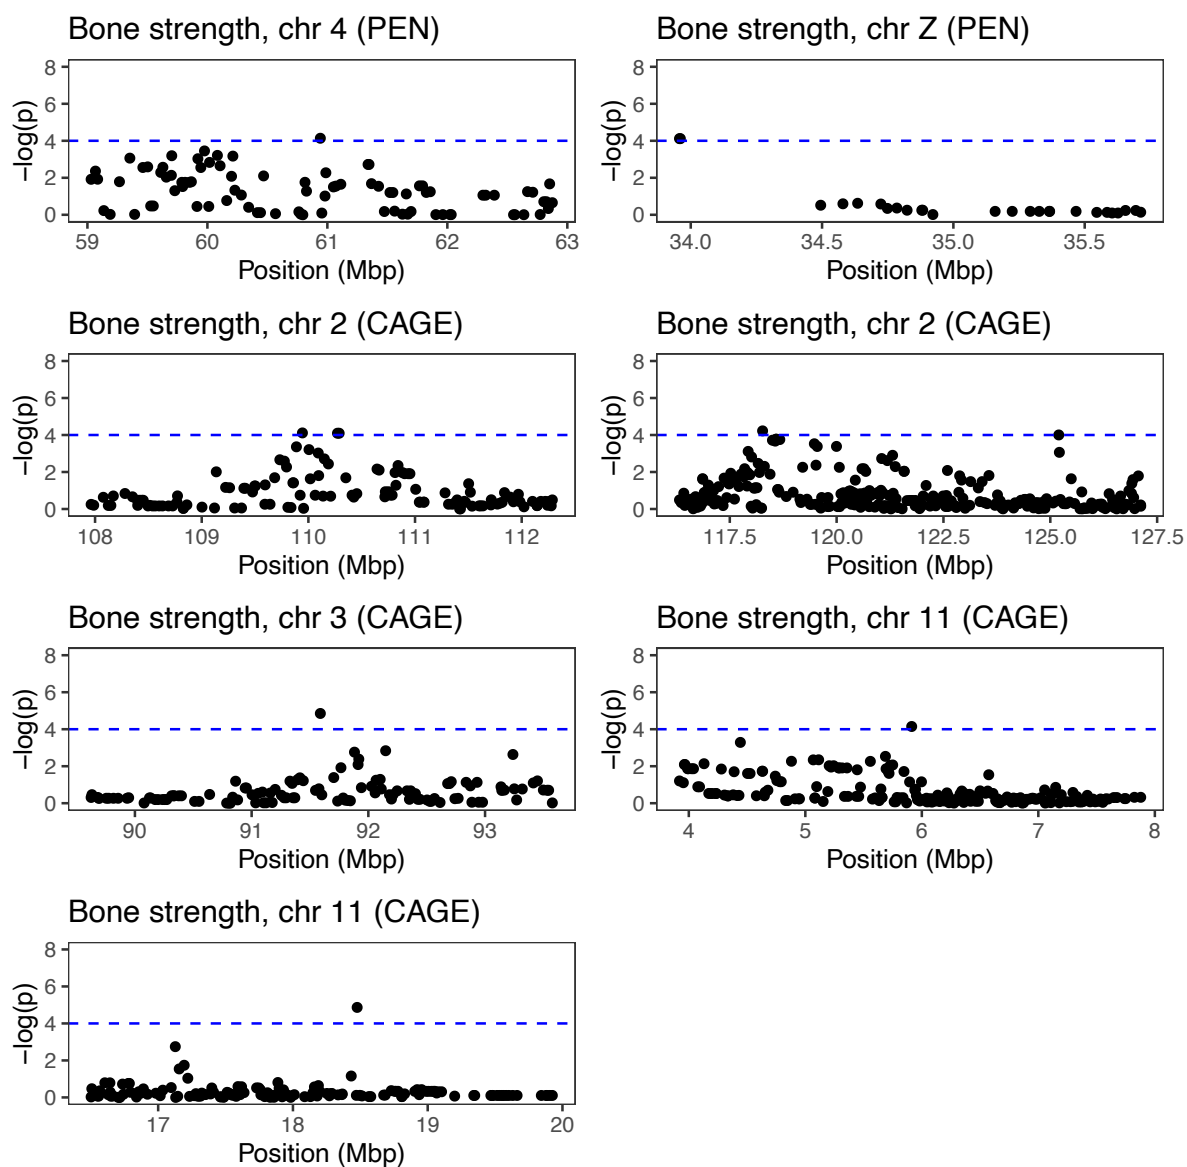

851  
852  
853  
854  
855

Supplementary Figure 7. Zoomed-in view of suggestive genome-wide associations for bone breaking strength. The dashed blue line shows a suggestive threshold of  $10^{-4}$ .

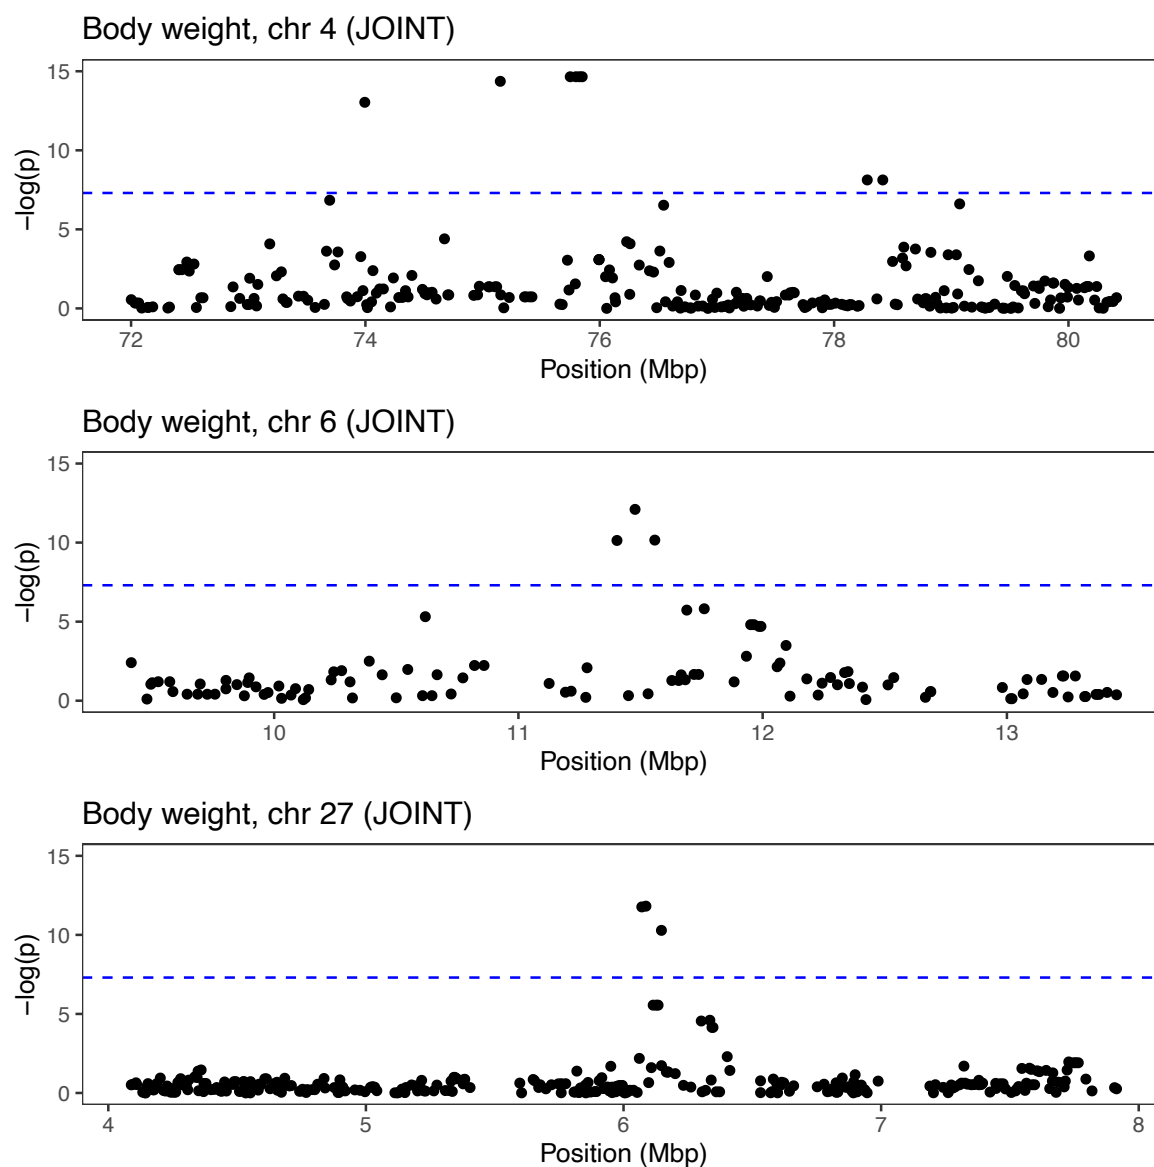

856  
857  
858  
859  
860  
861

Supplementary Figure 8. Zoomed-in view on genome-wide associations for body weight. The dashed red line shows a conventional genome-wide significance threshold of  $5 * 10^{-8}$ .

### Conditional GWAS of body weight on chromosome 4

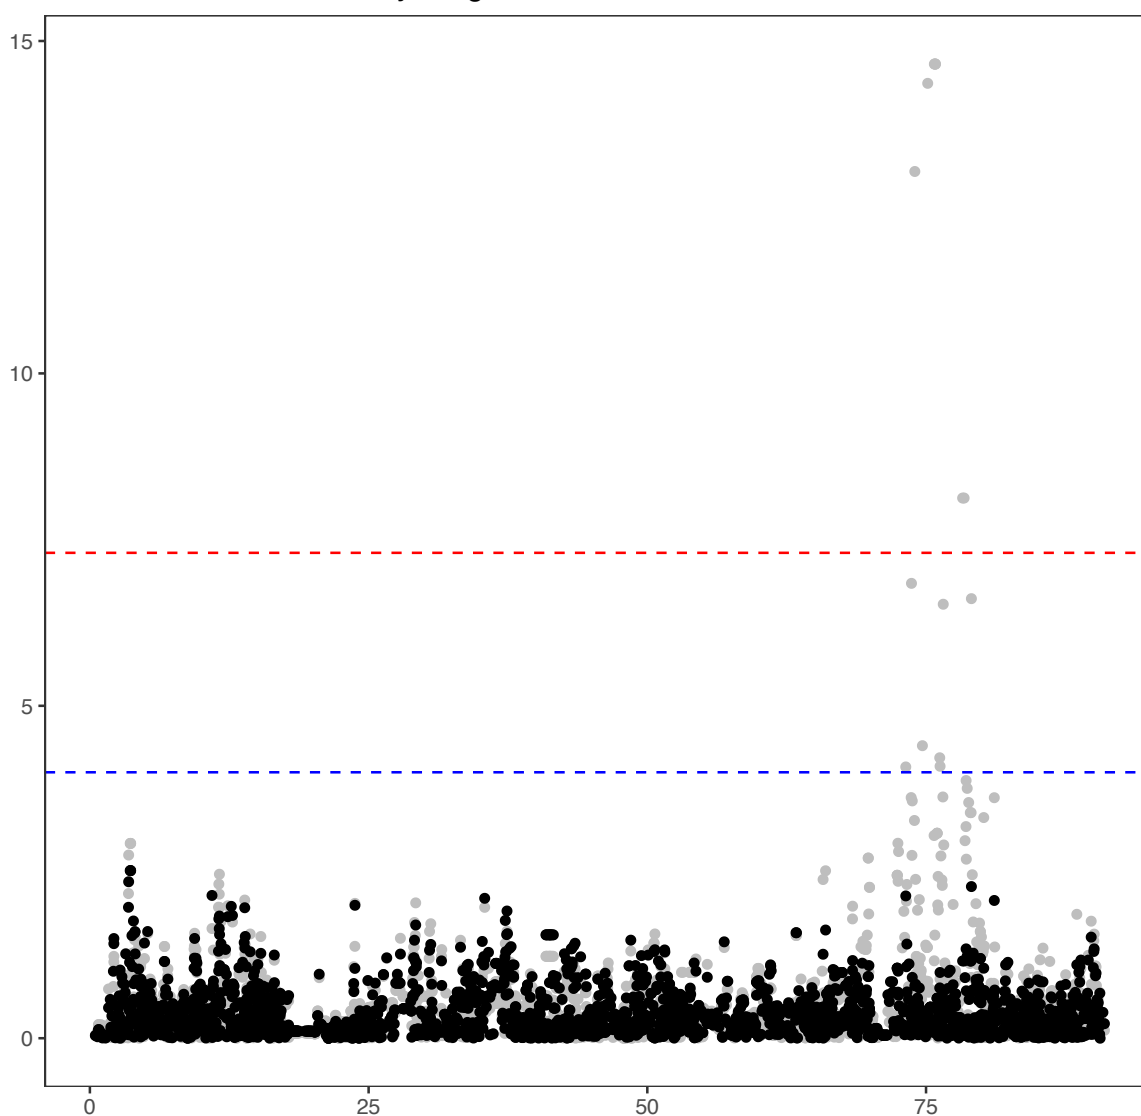

862  
863

864 Supplementary Figure 9. Conditional GWAS of the chromosome 4 locus for body weight. The  
865 plot shows the negative logarithm of the p-value for chromosome 4, with grey dots being  
866 the joint GWAS performed in the main analysis, and black dots a conditional GWAS including  
867 the lead SNP from the locus. This conditional scan removes associations throughout the  
868 region.

869

870

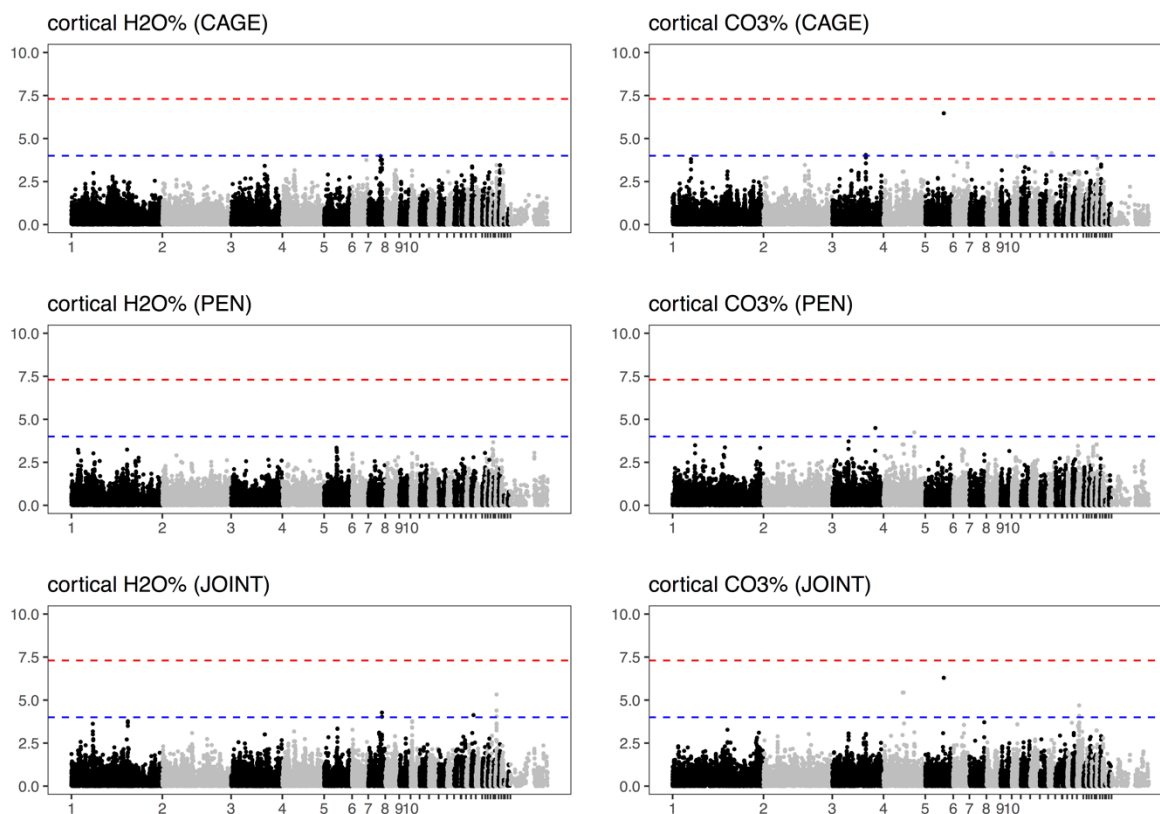

871

872

873

874 Supplementary Figure 11. Genome-wide association of bone composition phenotypes that  
875 had significant heritability in both housing system. Chromosome names of the smaller  
876 chromosomes have been suppressed for legibility. The dashed red line shows a conventional  
877 genome-wide significance threshold of  $5 * 10^{-8}$ , and the dashed blue line a suggestive  
878 threshold of  $10^{-4}$ .

879

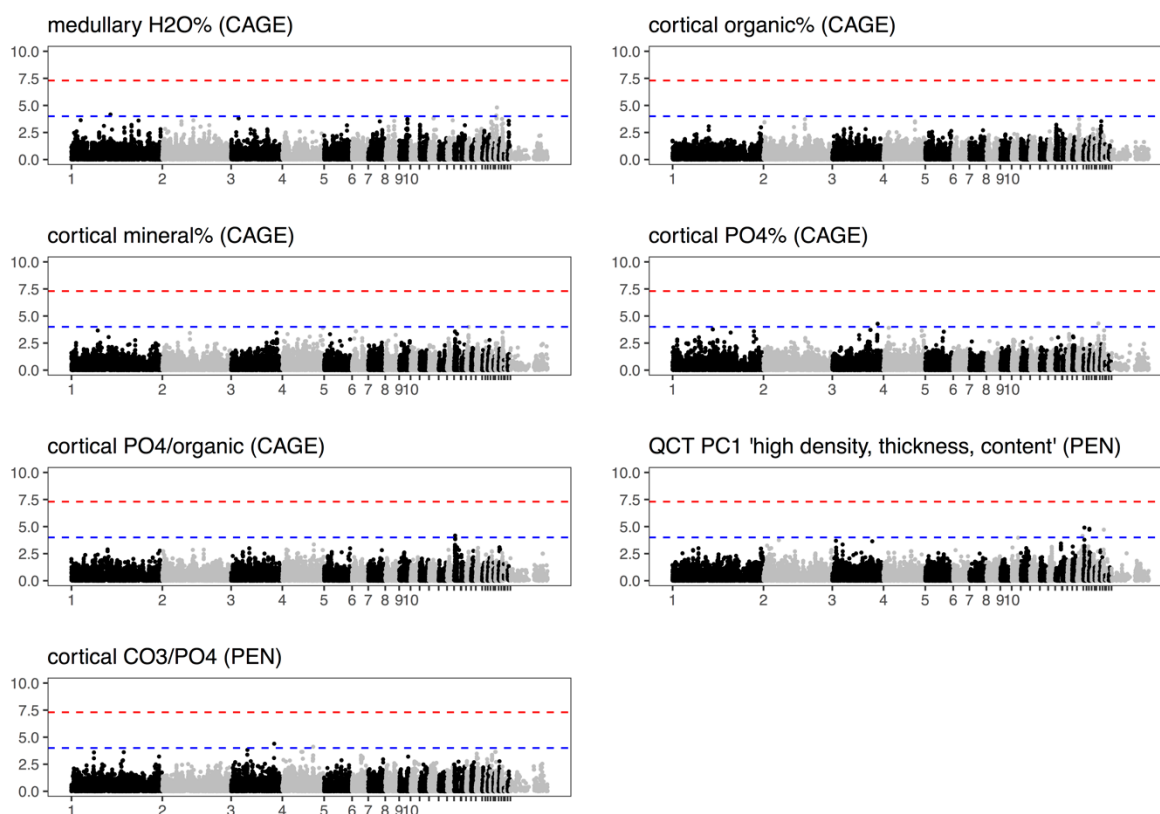

880  
881

882 Supplementary Figure 12. Genome-wide association of bone phenotypes that had  
883 significant heritability only in one housing system. Chromosome names of the smaller  
884 chromosomes have been suppressed for legibility. The dashed red line shows a conventional  
885 genome-wide significance threshold of  $5 \times 10^{-8}$ , and the dashed blue line a suggestive  
886 threshold of  $10^{-4}$ .  
887

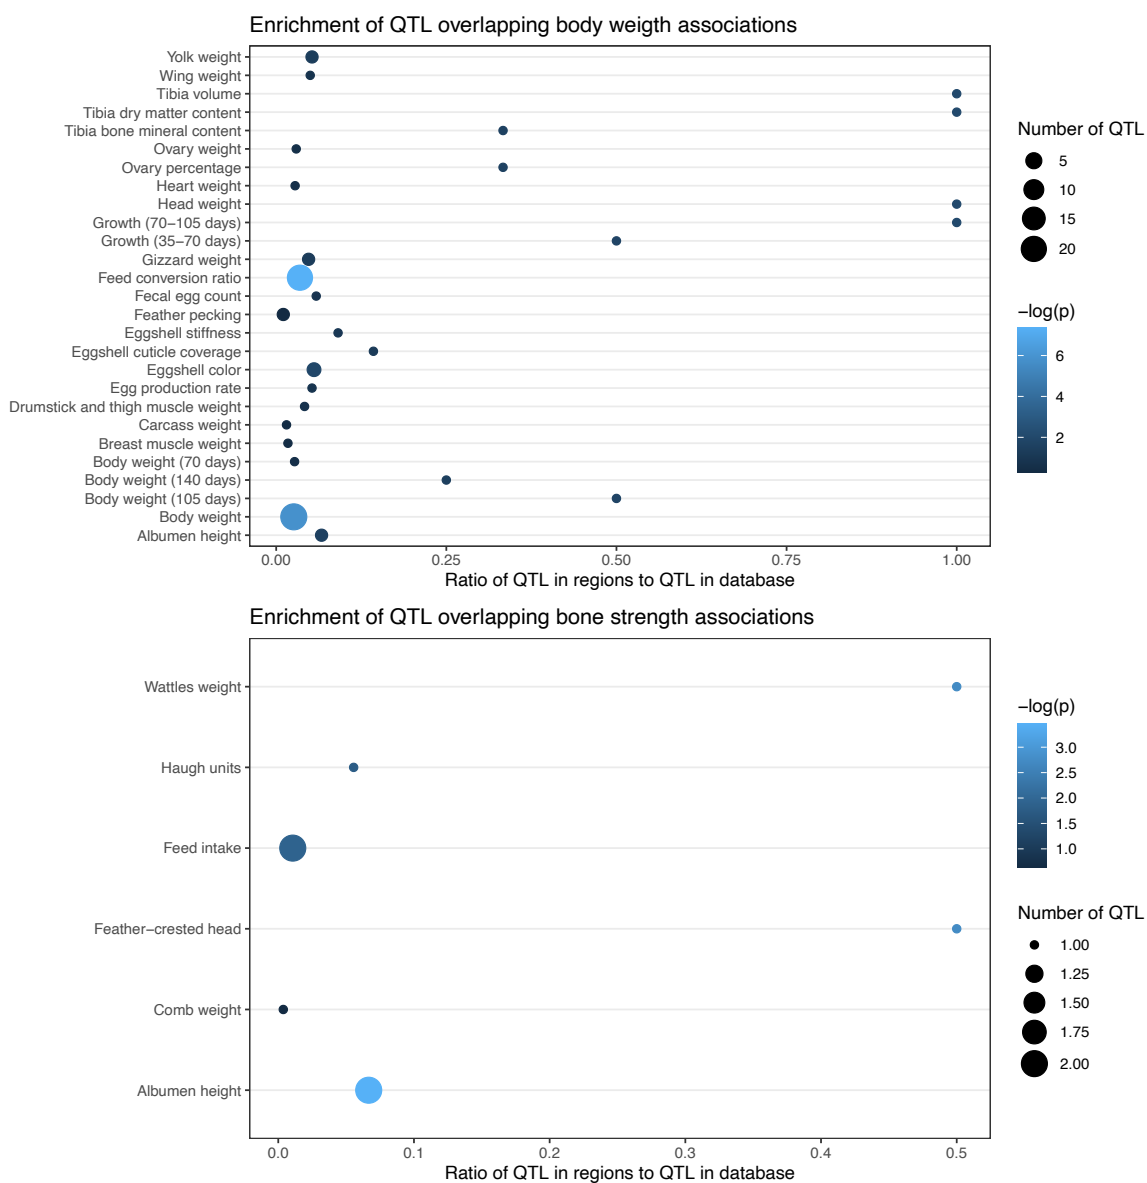

888  
889  
890  
891  
892

Supplementary Figure 13. Enrichment of previously published QTL from the Chicken QTLdb database overlapping significant body weight and suggestive bone strength associations.

893 Description of supplementary tables

894

895 Supplementary Table 1. Sample sizes.

896

897 Supplementary Table 2. Predefined candidate regions derived from previous studies.

898

899 Supplementary Table 3. Markers in predefined candidate regions with  $p < 0.01$ .

900

901 Supplementary Table 4. Genomic heritabilities and correlations from bivariate model.

902

903 Supplementary Table 5. Suggestive associations from genome-wide association studies.

904

905 Supplementary Dataset 1. Summary statistics for all markers from genome-wide association  
906 studies.

907

908

909
